# Supplementary material for: Lower limb biomechanical characteristics of patients with neuropathic diabetic foot ulcers: the diabetes foot ulcer study protocol
Source: Springer Nature journal article supplement (doi:10.1186/s12902-015-0057-7), 2015-10-23
Supplement: MOESM1 [file 9753966]

## Supplement 1: Case Report Form

|                                                                           |                                                                                                                                                                                                                                                                                     |
|---------------------------------------------------------------------------|-------------------------------------------------------------------------------------------------------------------------------------------------------------------------------------------------------------------------------------------------------------------------------------|
| Protocol Title:                                                           | <p style="text-align: center;"><b>Full Title:</b><br/> <u><b>Lower limb biomechanical characteristics of patients with neuropathic foot ulcers (DFU study)</b></u></p> <p style="text-align: center;"><b>Short title:</b><br/> <u><b>Diabetes and Foot Ulceration Study</b></u></p> |
| Participant Initials:                                                     | _____                                                                                                                                                                                                                                                                               |
| Unique identification number                                              | D F U _____                                                                                                                                                                                                                                                                         |
| Date of Birth:                                                            | ____/____/____                                                                                                                                                                                                                                                                      |
| Site:                                                                     | The Townsville Hospital- Diabetes Clinic, Department of Endocrinology<br>&<br>James Cook University Movement Analysis Laboratory                                                                                                                                                    |
| Scheduled date of first Gait analysis investigation                       | ____/____/____                                                                                                                                                                                                                                                                      |
| <b>Participant Alerts:</b><br><b>(Allergies or specific requirements)</b> |                                                                                                                                                                                                                                                                                     |
| Date Completed:                                                           | ____/____/____                                                                                                                                                                                                                                                                      |

| Diabetes and Foot ulceration Study |           |       |
|------------------------------------|-----------|-------|
| Unique Identification Number:      | UR:       | Name: |
| DOB:                               | Initials: |       |

## **Case Report Form (CRF) Completion Instructions**

Please ensure the headers are completed on each page

- Participant Initials should be recorded as a three-letter sequence of the participant's initials (First, Middle, Last). If the participant does not have a middle name use a dash (-)
- Patient identification-number for the study.

Complete all pages in a medium to heavy point black ink pen **ONLY**

Ensure all figures are written inside the designated space, try not to touch the boundaries of this space to maximise accuracy

All text and explanatory comments should be brief and written within the space provided

To answer multiple choice questions place a cross (X) inside the designated space

DO NOT use liquid paper or permanently remove or cover an error. To make a correction, drawn a single line through the original value and write the new value as close as possible to the original space. Initial and date the correction

Do not fold the forms.

If there are any questions please contact the principal study investigator:

Mr. Malindu (Mal) Fernando  
Podiatrist and Cohort Doctoral Candidate  
James Cook University, Faculty of Medicine and Molecular Sciences.  
Telephone: +61 7 47813144  
Fax: + 61 7 47813179  
Email- malindu.fernando@my.jcu.edu.au

| Diabetes and Foot ulceration Study |           |       |
|------------------------------------|-----------|-------|
| Unique Identification Number:      | UR:       | Name: |
| DOB:                               | Initials: |       |

### Visit 1, Part 1- Site The Townsville Hospital.

#### Eligibility Criteria

##### Inclusion Criteria

*All criterion listed below must be answered **YES** for the participant to be considered eligible*

|   |                                                                                                                |                                                          |
|---|----------------------------------------------------------------------------------------------------------------|----------------------------------------------------------|
| 1 | Has the participant been clinically diagnosed with Type II diabetes mellitus or receiving medication for this? | <input type="checkbox"/> Yes <input type="checkbox"/> No |
| 2 | Is the participant able to walk unassisted, utilising two feet?                                                | <input type="checkbox"/> Yes <input type="checkbox"/> No |
| 3 | Has the participant agreed to comply with all study procedures and instructions?                               | <input type="checkbox"/> Yes <input type="checkbox"/> No |

##### Exclusion Criteria

*All criterion listed below must be answered **NO** for the participant to be considered eligible*

|   |                                                                                                                                             |                                                          |
|---|---------------------------------------------------------------------------------------------------------------------------------------------|----------------------------------------------------------|
| 1 | Does the participant have type I diabetes                                                                                                   | <input type="checkbox"/> Yes <input type="checkbox"/> No |
| 2 | Is the participant an amputee, either BKA or have any foot amputation?                                                                      | <input type="checkbox"/> Yes <input type="checkbox"/> No |
| 3 | Does the participant have a known vascular reconstruction or orthopaedic surgical procedure scheduled or planned within the next 12 months? | <input type="checkbox"/> Yes <input type="checkbox"/> No |
| 4 | Has the participant previously had foot and ankle surgery?                                                                                  | <input type="checkbox"/> Yes <input type="checkbox"/> No |
| 5 | Does the participant have a bleeding disorder?                                                                                              | <input type="checkbox"/> Yes <input type="checkbox"/> No |
| 6 | Is the participant under 18 years of age?                                                                                                   | <input type="checkbox"/> Yes <input type="checkbox"/> No |
| 7 | Does the participant require ambulatory assistance?                                                                                         | <input type="checkbox"/> Yes <input type="checkbox"/> No |
| 8 | Is the participant pregnant?                                                                                                                | <input type="checkbox"/> Yes <input type="checkbox"/> No |

**Note- If the patient has a present plantar foot ulcer, allocate patient to case group and if not, allocate patient to control group.**

**Is the participant a healthy control?**

**Yes**

**No**

| Diabetes and Foot ulceration Study |           |       |
|------------------------------------|-----------|-------|
| Unique Identification Number:      | UR:       | Name: |
| DOB:                               | Initials: |       |

### **Visit 1**

#### **Informed Consent**

|                                                                                                                                                                                                                                                            |                                                   |
|------------------------------------------------------------------------------------------------------------------------------------------------------------------------------------------------------------------------------------------------------------|---------------------------------------------------|
| PICF version                                                                                                                                                                                                                                               | Patient Has consented to sections<br><b>A B C</b> |
| Date on which Informed Consent was obtained <input type="text"/> <input type="text"/> / <input type="text"/> <input type="text"/> <input type="text"/> <input type="text"/> <input type="text"/> <input type="text"/> <input type="text"/><br>(dd/mm/yyyy) |                                                   |

#### **Demographics**

|                                                                                                                                                                                                                              |                                                               |
|------------------------------------------------------------------------------------------------------------------------------------------------------------------------------------------------------------------------------|---------------------------------------------------------------|
| Date of birth <input type="text"/> <input type="text"/> / <input type="text"/> <input type="text"/> <input type="text"/> <input type="text"/> <input type="text"/> <input type="text"/> <input type="text"/><br>(dd/mm/yyyy) |                                                               |
| Gender                                                                                                                                                                                                                       | <input type="checkbox"/> Male <input type="checkbox"/> Female |
| <b>Ethnicity</b><br>Caucasian<br>Asian<br>African<br>Aboriginal/ Torres strait islander<br>Other _____                                                                                                                       |                                                               |
| Aboriginal or Torres strait Islander?                                                                                                                                                                                        | Yes No                                                        |

#### **Smoking status**

|                                                                                |                                          |
|--------------------------------------------------------------------------------|------------------------------------------|
| Never smoked <input type="checkbox"/>                                          |                                          |
| Ex-smoker (has not smoked in the last month)* <input type="checkbox"/>         | Current smoker* <input type="checkbox"/> |
| *If an ex- or current smoker please answer the following                       |                                          |
| Number of years smoking <input type="text"/> <input type="text"/>              |                                          |
| Average number of cigarettes per day <input type="text"/> <input type="text"/> |                                          |

#### **Medical History**

Please note that the definition of these conditions is based on a history of diagnosis or treatment

|                                     |                                                          |
|-------------------------------------|----------------------------------------------------------|
| Hypertension                        | <input type="checkbox"/> Yes <input type="checkbox"/> No |
| Dyslipidemia                        | <input type="checkbox"/> Yes <input type="checkbox"/> No |
| Stroke/ TIA – Date _____            | <input type="checkbox"/> Yes <input type="checkbox"/> No |
| Peripheral Arterial Disease         | <input type="checkbox"/> Yes <input type="checkbox"/> No |
| Cancer or other neoplastic syndrome | <input type="checkbox"/> Yes <input type="checkbox"/> No |
| Ischemic Heart Disease              | <input type="checkbox"/> Yes <input type="checkbox"/> No |
| Cardiac or vascular surgery-        | <input type="checkbox"/> Yes <input type="checkbox"/> No |

| Diabetes and Foot ulceration Study |           |       |
|------------------------------------|-----------|-------|
| Unique Identification Number:      | UR:       | Name: |
| DOB:                               | Initials: |       |

|                                                                |                                                          |
|----------------------------------------------------------------|----------------------------------------------------------|
| Congestive Heart Failure                                       | <input type="checkbox"/> Yes <input type="checkbox"/> No |
| Chronic Pulmonary Disease                                      | <input type="checkbox"/> Yes <input type="checkbox"/> No |
| Chronic Liver Disease                                          | <input type="checkbox"/> Yes <input type="checkbox"/> No |
| Chronic Renal Impairment                                       | <input type="checkbox"/> Yes <input type="checkbox"/> No |
| DVT- Deep vein thrombosis                                      | Yes <input type="checkbox"/> No                          |
| Charcot's neuroarthropathy/ Charcot foot                       | Yes <input type="checkbox"/> No                          |
| Visual impairment from Macular degeneration or Glaucoma/ other | Yes <input type="checkbox"/> No                          |

### **Diabetes and ulcer history**

|                                                                                                    |                                                                                   |
|----------------------------------------------------------------------------------------------------|-----------------------------------------------------------------------------------|
| Year and month Diagnosed-<br>Duration _____ years and _____ months.                                | Uses insulin as a part of diabetes management?<br>Yes                  No         |
| Positive Family History    Yes                  No                                                 | HAB1C-                                                                            |
| Have you had a foot ulcer in the past?<br>Yes                  No                                  | Has this ulcer been plantar in location?<br>Yes                  No               |
| Is the present ulcer in the same location where you had the last ulcer?<br>Yes                  No | Have you had more than one previous ulcer in the past?<br>Yes                  No |

### **Physical Activity History**

|                                                                                    |                                                                                                                         |
|------------------------------------------------------------------------------------|-------------------------------------------------------------------------------------------------------------------------|
| 1. How many hours a week would you be standing? (work, home, leisure)<br>_____ hrs | 2. How many hours a week are you on your feet and walking?<br>_____ hrs                                                 |
| 3. Do you do regular exercise that includes walking?<br>Yes                  No    | 4. Do you get pain in your feet, legs or buttock areas that keep you from walking regularly?<br>Yes                  No |
| 3A. If yes how many hours a week walking is this?<br>_____ hrs.                    | 5. How many hours a week are you off your feet (resting, sleeping, sitting)<br>_____ hrs.                               |

|                                                                    |
|--------------------------------------------------------------------|
| Total hours in three months standing (weight bearing)<br>_____ hrs |
| Total hours in three months walking (weight bearing)<br>_____ hrs  |



| Diabetes and Foot ulceration Study |           |       |
|------------------------------------|-----------|-------|
| Unique Identification Number:      | UR:       | Name: |
| DOB:                               | Initials: |       |

### **Physical Measurements**

|                                                                           |                                                                                                |
|---------------------------------------------------------------------------|------------------------------------------------------------------------------------------------|
| Height: <input type="text"/> <input type="text"/> <input type="text"/> cm | Weight: <input type="text"/> <input type="text"/> <input type="text"/> <input type="text"/> kg |
| BMI: _____                                                                |                                                                                                |
| Waist circumference<br>_____ cm                                           |                                                                                                |
| Hip circumference _____ cm                                                |                                                                                                |

### **Visual test (Diabetic retinopathy)**

**Has the patient seen an optometrist in the last 12 months? Yes No**

### **Optometrist Details-**

**Does the patient need optometrist referral?**

### **Visual acuity score-**

**Podiatric Examination-** To be conducted using a goniometer for values for ROM

| Examination                                                 | Right                                           |        |   | Left                                            |        |   |
|-------------------------------------------------------------|-------------------------------------------------|--------|---|-------------------------------------------------|--------|---|
| Ankle Joint ROM (deg)                                       |                                                 |        |   |                                                 |        |   |
| STJ ROM (deg)                                               |                                                 |        |   |                                                 |        |   |
| 1 <sup>st</sup> MTPJ ROM (deg)                              |                                                 |        |   |                                                 |        |   |
| HAV- Hallux Abducto Valgus Deformity Stage Manchester Scale |                                                 |        |   |                                                 |        |   |
| Foot type                                                   | Pes Planus<br>Pes Cavus<br>Regular Arch Contour |        |   | Pes Planus<br>Pes Cavus<br>Regular Arch Contour |        |   |
| Muscle strength DF/PF                                       | 1<br>4                                          | 2<br>5 | 3 | 1<br>4                                          | 2<br>5 | 3 |
| Muscle Strength Inv/Evr                                     | 1<br>4                                          | 2<br>5 | 3 | 1<br>4                                          | 2<br>5 | 3 |
| Muscle Strength Abduction/Adduction                         | 1<br>4                                          | 2<br>5 | 3 | 1<br>4                                          | 2<br>5 | 3 |

| Diabetes and Foot ulceration Study |           |       |
|------------------------------------|-----------|-------|
| Unique Identification Number:      | UR:       | Name: |
| DOB:                               | Initials: |       |

|                                                           |                                                                                                                                                                                                     |                                                                                                                                                                                                     |
|-----------------------------------------------------------|-----------------------------------------------------------------------------------------------------------------------------------------------------------------------------------------------------|-----------------------------------------------------------------------------------------------------------------------------------------------------------------------------------------------------|
| Lesser toe deformities (Claw toe, Hammer Toe, Mallet toe) | Claw Toe<br>Hammer Toe<br>Mallet Toe                                                                                                                                                                | Claw Toe<br>Hammer Toe<br>Mallet Toe                                                                                                                                                                |
| Plantar hyperkeratosis locations                          | Plantar first metatarsal head<br>Plantar PMA 1-3<br>Plantar Apex of toes<br>Plantar Calcaneal area<br>Medial Hallux<br>Plantar 5 <sup>th</sup> metatarsal head<br>Plantar PMA 4-5<br>Plantar Cuboid | Plantar first metatarsal head<br>Plantar PMA 1-3<br>Plantar Apex of toes<br>Plantar Calcaneal area<br>Medial Hallux<br>Plantar 5 <sup>th</sup> metatarsal head<br>Plantar PMA 4-5<br>Plantar Cuboid |
| Lunge test                                                | <35 Degrees<br>35 Degrees<br>>35 Degrees                                                                                                                                                            | <35 Degrees<br>35 Degrees<br>>35 Degrees                                                                                                                                                            |
| MSRT                                                      | 1            2            3<br>4            5                                                                                                                                                       | 1            2            3<br>4            5                                                                                                                                                       |
| Jack's test                                               | Positive<br>Negative                                                                                                                                                                                | Positive<br>Negative                                                                                                                                                                                |

#### Vascular and Neurological examination

| Investigation                                 | Right                                                                                                                                                                                                | Left                                                                                                                                                                                                 |
|-----------------------------------------------|------------------------------------------------------------------------------------------------------------------------------------------------------------------------------------------------------|------------------------------------------------------------------------------------------------------------------------------------------------------------------------------------------------------|
| <b><u>Foot Pulses</u></b>                     |                                                                                                                                                                                                      |                                                                                                                                                                                                      |
| Posterior Tibialis                            | Present/Normal Reduced Absent                                                                                                                                                                        | Present/Normal Reduced Absent                                                                                                                                                                        |
| Dorsalis Pedis                                | Present/Normal Reduced Absent                                                                                                                                                                        | Present/Normal Reduced Absent                                                                                                                                                                        |
| Anterior tibialis                             | Present/Normal Reduced Absent                                                                                                                                                                        | Present/Normal Reduced Absent                                                                                                                                                                        |
| <b><u>ABI</u></b>                             |                                                                                                                                                                                                      |                                                                                                                                                                                                      |
| Brachial                                      | 1                                                                                                                                                                                                    | 1                                                                                                                                                                                                    |
| Posterior Tibialis                            | 2                                                                                                                                                                                                    | 2                                                                                                                                                                                                    |
| Dorsalis Pedis                                | 3                                                                                                                                                                                                    | 3                                                                                                                                                                                                    |
| Anterior Tibial                               | 4                                                                                                                                                                                                    | 4                                                                                                                                                                                                    |
|                                               | <b>ABI =</b>                                                                                                                                                                                         | <b>ABI =</b>                                                                                                                                                                                         |
| Toe perfusion pressure (Hallux Pressure)      | 1<br>2<br>3<br><b>Mean=</b>                                                                                                                                                                          | 1<br>2<br>3<br><b>Mean=</b>                                                                                                                                                                          |
| Monofilament test<br>Site specification (/10) | 1. Plantar Hallux<br>2. Plantar metatarsal 2<br>3. Plantar metatarsal 3<br>4. Plantar metatarsal 4<br>5. Plantar metatarsal 5<br>6. Plantar Arch- (Navicular)<br>7. Plantar 2 <sup>nd</sup> toe apex | 1. Plantar Hallux<br>2. Plantar metatarsal 2<br>3. Plantar metatarsal 3<br>4. Plantar metatarsal 4<br>5. Plantar metatarsal 5<br>6. Plantar Arch- (Navicular)<br>7. Plantar 2 <sup>nd</sup> toe apex |



| Diabetes and Foot ulceration Study |           |       |
|------------------------------------|-----------|-------|
| Unique Identification Number:      | UR:       | Name: |
| DOB:                               | Initials: |       |

|                                                                    |                                                                                        |                                                                                        |
|--------------------------------------------------------------------|----------------------------------------------------------------------------------------|----------------------------------------------------------------------------------------|
|                                                                    | 8. Plantar 5 <sup>th</sup> toe apex<br>9. Dorsal Hallux<br>10. Plantar Medial Tubercle | 8. Plantar 5 <sup>th</sup> toe apex<br>9. Dorsal Hallux<br>10. Plantar Medial Tubercle |
| Neurothesiometer Reading at which vibration felt at tip of hallux. | >25 V<br>25 V<br>< 25 V                                                                | >25 V<br>25 V<br>< 25 V                                                                |

Does the patient have a present plantar foot ulcer?

Yes

No

(If yes, please fill out planimetry and ulcer assessment table below and also get consent for biopsy)

**Planimetry and Ulcer assessment**

| <u>Investigation</u>                                       | <u>Ulcer 1</u>                                                              | <u>Ulcer 2</u>                                                                    | <u>Ulcer 3</u>                                                |
|------------------------------------------------------------|-----------------------------------------------------------------------------|-----------------------------------------------------------------------------------|---------------------------------------------------------------|
| Ulcer Location                                             |                                                                             |                                                                                   |                                                               |
| Estimated duration of ulcer<br>In weeks                    |                                                                             |                                                                                   |                                                               |
| Planimetric depth<br>cm3                                   |                                                                             |                                                                                   |                                                               |
| Planimetry<br>Length cm<br>Width cm<br>Area cm             | Length _____ cm<br>Width _____ cm<br>Area _____ cm                          | Length _____ cm<br>Width _____ cm<br>Area _____ cm                                | Length _____ cm<br>Width _____ cm<br>Area _____ cm            |
| Wound exudate/<br>discharge present<br>and type of exudate | Mild                  Serous<br>Moderate<br>Purulent<br>High<br>Haemoserous | Mild                  Serous<br>Moderate          Purulent<br>High<br>Haemoserous | Mild<br>Serous<br>Moderate<br>Purulent<br>High<br>Haemoserous |
| UTWCS Grading                                              |                                                                             |                                                                                   |                                                               |
| Wound Bed                                                  | Necrotic<br>Granulating<br>Epithelializing<br>Sloughy<br>Pale               | Necrotic<br>Granulating<br>Epithelializing<br>Sloughy<br>Pale                     | Necrotic<br>Granulating<br>Epithelializing<br>Sloughy<br>Pale |

| Diabetes and Foot ulceration Study |           |       |
|------------------------------------|-----------|-------|
| Unique Identification Number:      | UR:       | Name: |
| DOB:                               | Initials: |       |

|                                                                                      | Hypergranulating Bone                                                                                             | Hypergranulating Bone                                                                                             | Hypergranulating Bone                                                                                             |
|--------------------------------------------------------------------------------------|-------------------------------------------------------------------------------------------------------------------|-------------------------------------------------------------------------------------------------------------------|-------------------------------------------------------------------------------------------------------------------|
| Wound Edge                                                                           | Regular<br>Irregular<br>Undermined<br>Rolling                                                                     | Regular<br>Irregular<br>Undermined<br>Rolling                                                                     | Regular<br>Irregular<br>Undermined<br>Rolling                                                                     |
| Sinus Formation<br>Yes          No                                                   | Yes          No<br>mm _____                                                                                       | Yes          No<br>mm _____                                                                                       | Yes          No<br>mm _____                                                                                       |
| Is the ulcer infected?<br>-Conduct Wound Swab for presence of pathological microbes. | Yes<br><br>No                                                                                                     | Yes<br><br>No                                                                                                     | Yes<br><br>No                                                                                                     |
| Type of organism causing infection (As per pathology test)                           |                                                                                                                   |                                                                                                                   |                                                                                                                   |
| Type of ulcer (Neuropathic, Neuroischemic)                                           | Neuropathic<br><br>Neuroischemic                                                                                  | Neuropathic<br><br>Neuroischemic                                                                                  | Neuropathic<br><br>Neuroischemic                                                                                  |
| Surrounding Skin                                                                     | Macerated<br>Hyperkeratotic<br>Indurated<br>Normal/healthy<br>Fragile<br>Erythematous<br>Oedematous<br>Anhidrotic | Macerated<br>Hyperkeratotic<br>Indurated<br>Normal/healthy<br>Fragile<br>Erythematous<br>Oedematous<br>Anhidrotic | Macerated<br>Hyperkeratotic<br>Indurated<br>Normal/healthy<br>Fragile<br>Erythematous<br>Oedematous<br>Anhidrotic |
| Orthoses Used?                                                                       | Yes      No                                                                                                       | Yes      No                                                                                                       | Yes      No                                                                                                       |
| Offloading shoe or boot-walker used?                                                 | Yes      No                                                                                                       | Yes      No                                                                                                       | Yes      No                                                                                                       |
| Type of Off-loading Device                                                           | TCC<br>Foot Orthoses<br>AFO<br>Padding<br>No offloading                                                           | TCC<br>Foot Orthoses<br>AFO<br>Padding<br>No offloading                                                           | TCC<br>Foot Orthoses<br>AFO<br>Padding<br>No offloading                                                           |
| How often is the ulcer seen by a health professional in a month? (X 3 )              |                                                                                                                   |                                                                                                                   |                                                                                                                   |

| Diabetes and Foot ulceration Study |           |       |
|------------------------------------|-----------|-------|
| Unique Identification Number:      | UR:       | Name: |
| DOB:                               | Initials: |       |

|                                                          |  |  |  |
|----------------------------------------------------------|--|--|--|
| How often is the ulcer dressing changed per month? (x 3) |  |  |  |
|----------------------------------------------------------|--|--|--|

**Is a photograph of the ulcer taken?**                      **Yes      No**

### **Note**

Quality of life questionnaire to be handed to the patient at this point to fill out then the details and dates for gait assessment visit and follow-up visit on a follow-up card should be given to the patient. Contact details are then recorded separately.

**Pedometer Given to Patient?**      **Yes      No**

### **Blood Collection – Pathology**

**Refer patient to SNP pathology for blood collection.**

|                                                                                  |                                                                                 |
|----------------------------------------------------------------------------------|---------------------------------------------------------------------------------|
| Blood collection form given to patient?                                          | <input type="checkbox"/> Yes <input type="checkbox"/> No                        |
| Date of Collection                                                               | <input type="text"/> / <input type="text"/> / <input type="text"/> (dd/mm/yyyy) |
| Haemoglobin <input type="text"/> g/L                                             | LD <input type="text"/> U/L                                                     |
| WCC <input type="text"/> . <input type="text"/> 10 <sup>9</sup> /L               | Cholesterol <input type="text"/> . <input type="text"/> mmol/L                  |
| Platelets <input type="text"/> 10 <sup>9</sup> /L                                | Triglyceride <input type="text"/> . <input type="text"/> mmol/L                 |
| Fibrinogen <input type="text"/> . <input type="text"/> g/L                       | HDL <input type="text"/> . <input type="text"/> mmol/L                          |
| Sodium <input type="text"/> mmol/L                                               | LDL <input type="text"/> . <input type="text"/> mmol/L                          |
| Potassium <input type="text"/> . <input type="text"/> mmol/L                     | CRP <input type="text"/> <input type="text"/> <input type="text"/> mg/L         |
| Urea <input type="text"/> mmol/L                                                 | Chloride <input type="text"/> <input type="text"/> mmol/L                       |
| Creatinine <input type="text"/> <input type="text"/> <input type="text"/> μmol/L | Bicarbonate <input type="text"/> <input type="text"/> mmol/L                    |

| Diabetes and Foot ulceration Study |           |       |
|------------------------------------|-----------|-------|
| Unique Identification Number:      | UR:       | Name: |
| DOB:                               | Initials: |       |

|                                                                                               |                                                                                          |
|-----------------------------------------------------------------------------------------------|------------------------------------------------------------------------------------------|
| eGFR <input type="text"/> <input type="text"/> <input type="text"/> mL/min/1.73m <sup>2</sup> | Calcium <input type="text"/> . <input type="text"/> <input type="text"/> mmol/L          |
| Fasting Glucose <input type="text"/> <input type="text"/> . <input type="text"/> μmol/L       | Phosphorus <input type="text"/> . <input type="text"/> mmol/L                            |
| HbA1C _____%                                                                                  | Total protein <input type="text"/> <input type="text"/> g/L                              |
| CRP _____mg/L                                                                                 | Hematocrit <input type="text"/> . <input type="text"/> <input type="text"/> mg/dL        |
| ESR _____mm/hr                                                                                | Neuts <input type="text"/> . <input type="text"/> 10 <sup>9</sup> /L                     |
| Parathyroid Hormone _____pg/ml                                                                | Lymphs <input type="text"/> . <input type="text"/> 10 <sup>9</sup> /L                    |
| N-(carboxymethyl) lysine (CML)<br>_____                                                       | Monos <input type="text"/> . <input type="text"/> 10 <sup>9</sup> /L                     |
| Non-CML advanced glycation end products (AGEs)<br>_____                                       | Eos <input type="text"/> . <input type="text"/> 10 <sup>9</sup> /L                       |
| Pentosidine<br>_____                                                                          | Baso <input type="text"/> . <input type="text"/> <input type="text"/> 10 <sup>9</sup> /L |
| Homocystine                                                                                   |                                                                                          |

| Diabetes and Foot ulceration Study |           |       |
|------------------------------------|-----------|-------|
| Unique Identification Number:      | UR:       | Name: |
| DOB:                               | Initials: |       |

## Vascular Biology Unit Blood Sample Storage Form

### Blood Collection –For VBU Biomarker Staff to complete

|                                                                           |                                                                                                                                                                                                                  |
|---------------------------------------------------------------------------|------------------------------------------------------------------------------------------------------------------------------------------------------------------------------------------------------------------|
| Has blood been collected for study analysis? (Check with SNP and Ratnesh) | <input type="checkbox"/> Yes <input type="checkbox"/> No                                                                                                                                                         |
| Date of Collection                                                        | <input type="text"/> <input type="text"/> / <input type="text"/> <input type="text"/> <input type="text"/> / <input type="text"/> <input type="text"/> <input type="text"/> <input type="text"/><br>(dd/mm/yyyy) |
| 2 x SST                                                                   | <input type="checkbox"/> Yes <input type="checkbox"/> No                                                                                                                                                         |
| 2 x EDTA                                                                  | <input type="checkbox"/> Yes <input type="checkbox"/> No                                                                                                                                                         |
| 1 x Sodium Citrate                                                        | <input type="checkbox"/> Yes <input type="checkbox"/> No                                                                                                                                                         |

### Sample Storage

|                                                                            |                                                               |                                                                                                                                                                                                                  |                     |
|----------------------------------------------------------------------------|---------------------------------------------------------------|------------------------------------------------------------------------------------------------------------------------------------------------------------------------------------------------------------------|---------------------|
| Have study bloods been processed and stored according to the lab manual?   |                                                               | <input type="checkbox"/> Yes <input type="checkbox"/> No*<br>*If NO, record a Protocol Deviation                                                                                                                 |                     |
| Date of Processing                                                         |                                                               | <input type="text"/> <input type="text"/> / <input type="text"/> <input type="text"/> <input type="text"/> / <input type="text"/> <input type="text"/> <input type="text"/> <input type="text"/><br>(dd/mm/yyyy) |                     |
|                                                                            | Number of Samples:                                            | Have samples been stored at the Protocol defined temperature?                                                                                                                                                    | Location of Samples |
| Serum<br>(from SST tubes)                                                  | <input type="text"/> <input type="text"/><br>(Store at -80°C) | <input type="checkbox"/> Yes <input type="checkbox"/> No*<br>*If NO, record a Protocol Deviation                                                                                                                 | Box #<br>Position # |
| EDTA Plasma<br>(Purple top EDTA tubes)                                     | <input type="text"/> <input type="text"/><br>(Store at -80°C) | <input type="checkbox"/> Yes <input type="checkbox"/> No*<br>*If NO, record a Protocol Deviation                                                                                                                 | Box #<br>Position # |
| EDTA RBC Pellet<br>(Remaining pellet from EDTA tubes with plasma removed ) | <input type="text"/> <input type="text"/><br>(Store at -80°C) | <input type="checkbox"/> Yes <input type="checkbox"/> No*<br>*If NO, record a Protocol Deviation                                                                                                                 | Box #<br>Position # |
| Citrate Plasma<br>(Blue top Citrate tubes)                                 | <input type="text"/> <input type="text"/><br>(Store at -80°C) | <input type="checkbox"/> Yes <input type="checkbox"/> No*<br>*If NO, record a Protocol Deviation                                                                                                                 | Box #<br>Position # |

| Diabetes and Foot ulceration Study |           |       |
|------------------------------------|-----------|-------|
| Unique Identification Number:      | UR:       | Name: |
| DOB:                               | Initials: |       |

|                                                                                                                          |                                                          |
|--------------------------------------------------------------------------------------------------------------------------|----------------------------------------------------------|
| Patient has completed blood test                                                                                         | <input type="checkbox"/> Yes <input type="checkbox"/> No |
| Patient fulfils the criteria for the study?                                                                              | <input type="checkbox"/> Yes <input type="checkbox"/> No |
| Patient is going to be placed in the group                                                                               | <div>Case</div> <div>Control</div>                       |
| Patient has filled out a quality of life questionnaire/s                                                                 | <input type="checkbox"/> Yes <input type="checkbox"/> No |
| Patient has been advised about the gait assessment date and time and location of the gait lab                            | <input type="checkbox"/> Yes <input type="checkbox"/> No |
| Patient has been advised of the date of next visit and advised to come after fasting for this, as if having a blood test | <input type="checkbox"/> Yes <input type="checkbox"/> No |

**Patient Contact information for follow-up visits**

|                                               |
|-----------------------------------------------|
| <b>Name</b>                                   |
| <b>Unique Identification Number -</b>         |
| <b>Telephone number</b>                       |
| <b>Address</b>                                |
| <b>Email</b>                                  |
| <b>Gait Assessment date and time -</b>        |
| <b>Next estimated visit date (3 months) -</b> |

| <b><u>Prior to Commencing Gait assessment</u></b> |                                                          |
|---------------------------------------------------|----------------------------------------------------------|
| Claudication Questionnaire Checked?               | Yes <input type="checkbox"/> No <input type="checkbox"/> |
| ABI is within normal range for participation?     | Yes <input type="checkbox"/> No <input type="checkbox"/> |
| Need vascular review?                             | Yes <input type="checkbox"/> No <input type="checkbox"/> |
| Needs ulcer dressing?                             | Yes <input type="checkbox"/> No <input type="checkbox"/> |

**Notes:**

| Diabetes and Foot ulceration Study |           |       |
|------------------------------------|-----------|-------|
| Unique Identification Number:      | UR:       | Name: |
| DOB:                               | Initials: |       |

## **Visit 1 – Part 2: Gait, Pressure and Biomechanical Assessment.**

### **Site- James Cook University, Gait Laboratory.**

#### **Physical Measurements**

|                       |    |                                                                                              |
|-----------------------|----|----------------------------------------------------------------------------------------------|
| ASIS Breadth          | cm | Mass: <input type="text"/> <input type="text"/> <input type="text"/> <input type="text"/> kg |
| Left Leg length       | cm | Height <input type="text"/> cm                                                               |
| Left Knee diameter    | cm |                                                                                              |
| Left malleolus width  | cm |                                                                                              |
| Right Leg length      | cm |                                                                                              |
| Right Knee diameter   | cm |                                                                                              |
| Right malleolus width | cm |                                                                                              |

#### **Testing protocol**

Measure up: ☐

EMG prep: ☐

MVC: ☐

Reflective markers prep ☐

Static capture ☐

10 walking trails ☐

Treadmill walking 4 minutes ☐

(Capture only 2:00 onwards)s

Self-Selected Walking Speed \_\_\_\_\_ km/hr.

Plantar pressure capture (3 walks) ☐

**FINISHED**

| Diabetes and Foot ulceration Study |           |       |
|------------------------------------|-----------|-------|
| Unique Identification Number:      | UR:       | Name: |
| DOB:                               | Initials: |       |

### **Data-Sets Post-Data extraction**

| <b><u>Primary Outcome measure</u></b>           | <b><u>Measurement</u></b>                                                                                                                                                                                                                     | <b><u>Left</u></b> | <b><u>Right</u></b> |
|-------------------------------------------------|-----------------------------------------------------------------------------------------------------------------------------------------------------------------------------------------------------------------------------------------------|--------------------|---------------------|
| Peak plantar pressure (N/Cm <sup>2</sup> )      | Medial Heel-<br>Lateral Heel<br>Medial Forefoot<br>Lateral Forefoot                                                                                                                                                                           |                    |                     |
| Pressure time integral (N/Cm <sup>2</sup> ) X s | Medial Heel-<br>Lateral Heel<br>Medial Forefoot<br>Lateral Forefoot                                                                                                                                                                           |                    |                     |
| Time of peak occurrence EMG (%)                 | Vastus Lateralis Lat<br>Gastrocnemius<br>Tibialis Anterior                                                                                                                                                                                    |                    |                     |
| GRF (N/Kg) <sup>D</sup>                         | Vertical<br>Med/Lat<br>Ant/Post                                                                                                                                                                                                               |                    |                     |
| Oxford Foot Model (deg)                         | Hindfoot Sag<br>Hindfoot Fron<br>Hindfoot T.V<br>Forefoot Sag<br>Forefoot Fron<br>Forefoot T.V                                                                                                                                                |                    |                     |
| Lower Limb Kinematics                           | <u>Stance Phase</u><br>Max hip Flex<br>Max hip Ext<br>Max Knee Flex<br>Max Knee Ext<br>Max Ankle DF<br>Max Ankle PF<br><br><u>Swing Phase</u><br>Max hip Flex<br>Max hip Ext<br>Max Knee Flex<br>Max Knee Ext<br>Max Ankle DF<br>Max Ankle PF |                    |                     |

### **EMG During Gait Assessment**



| Diabetes and Foot ulceration Study |           |       |
|------------------------------------|-----------|-------|
| Unique Identification Number:      | UR:       | Name: |
| DOB:                               | Initials: |       |

### **Maximum Voluntary Contraction**

| <u>Tibialis Anterior</u> | <u>Medial Gastroc</u> | <u>Lateral Gastroc</u> | <u>Peroneus Longus</u> | <u>Soleus</u> | <u>VMO</u> | <u>Semiten</u> |
|--------------------------|-----------------------|------------------------|------------------------|---------------|------------|----------------|
| <u>Right</u>             |                       |                        |                        |               |            |                |
| <u>Left</u>              |                       |                        |                        |               |            |                |

| (%)                    | <u>Tibialis Anterior</u> | <u>Medial Gastroc</u> | <u>Lateral Gastroc</u> | <u>Peroneus Longus</u> | <u>Soleus</u> | <u>VMO</u> | <u>Semiten</u> |
|------------------------|--------------------------|-----------------------|------------------------|------------------------|---------------|------------|----------------|
| <u>Peak Activation</u> |                          |                       |                        |                        |               |            |                |
| Left                   |                          |                       |                        |                        |               |            |                |
| Right                  |                          |                       |                        |                        |               |            |                |
| <u>Contact</u>         |                          |                       |                        |                        |               |            |                |
| Left                   |                          |                       |                        |                        |               |            |                |
| Right                  |                          |                       |                        |                        |               |            |                |
| <u>Stance</u>          |                          |                       |                        |                        |               |            |                |
| Left                   |                          |                       |                        |                        |               |            |                |
| Right                  |                          |                       |                        |                        |               |            |                |
| <u>Toe-off</u>         |                          |                       |                        |                        |               |            |                |
| Left                   |                          |                       |                        |                        |               |            |                |
| Right                  |                          |                       |                        |                        |               |            |                |
| <u>Swing</u>           |                          |                       |                        |                        |               |            |                |
| Left                   |                          |                       |                        |                        |               |            |                |
| Right                  |                          |                       |                        |                        |               |            |                |

| Diabetes and Foot ulceration Study |           |       |
|------------------------------------|-----------|-------|
| Unique Identification Number:      | UR:       | Name: |
| DOB:                               | Initials: |       |

### **Treadmill gait assessment**

| Assessment              | Parameter                                                                                                                                                                                                                                                   | Left | Right |
|-------------------------|-------------------------------------------------------------------------------------------------------------------------------------------------------------------------------------------------------------------------------------------------------------|------|-------|
| Oxford Foot Model (deg) | Hindfoot Sag<br>Hindfoot Fron<br>Hindfoot T.V<br>Forefoot Sag<br>Forefoot Fron<br>Forefoot T.V                                                                                                                                                              |      |       |
| Lower Limb Kinematics   | <b><u>Stance Phase</u></b><br>Max hip Flex<br>Max hip Ext<br>Max Knee Flex<br>Max Knee Ext<br>Max Ankle DF<br>Max Ankle PF<br><br><b><u>Swing Phase</u></b><br>Max hip Flex<br>Max hip Ext<br>Max Knee Flex<br>Max Knee Ext<br>Max Ankle DF<br>Max Ankle PF |      |       |

### **EMG During Treadmill Gait**

| <u>Muscle</u>                           | <u>Tibialis Anterior</u> | <u>Medial Gastroc</u> | <u>Lateral Gastroc</u> | <u>Peroneus Longus</u> | <u>Soleus</u> | <u>VMO</u> | <u>Semitendinosus</u> |
|-----------------------------------------|--------------------------|-----------------------|------------------------|------------------------|---------------|------------|-----------------------|
| <u>Peak Activation</u><br>Left<br>Right |                          |                       |                        |                        |               |            |                       |
| <u>MVC</u><br>Left<br>Right             |                          |                       |                        |                        |               |            |                       |
| <u>Contact</u><br>Left<br>Right         |                          |                       |                        |                        |               |            |                       |
| <u>Stance</u><br>Left                   |                          |                       |                        |                        |               |            |                       |

| Diabetes and Foot ulceration Study |           |       |
|------------------------------------|-----------|-------|
| Unique Identification Number:      | UR:       | Name: |
| DOB:                               | Initials: |       |

|                |  |  |  |  |  |  |  |
|----------------|--|--|--|--|--|--|--|
| Right          |  |  |  |  |  |  |  |
| <u>Toe-off</u> |  |  |  |  |  |  |  |
| Left           |  |  |  |  |  |  |  |
| Right          |  |  |  |  |  |  |  |
| <u>Swing</u>   |  |  |  |  |  |  |  |
| Left           |  |  |  |  |  |  |  |
| Right          |  |  |  |  |  |  |  |

1. Blood Collection Form Given
2. Questionnaires Collected (4)
3. Review-date organised
4. Pedometer calibrated and given?
5. Instructions given on Pedometer return?

## Notes

| Diabetes and Foot ulceration Study |           |       |
|------------------------------------|-----------|-------|
| Unique Identification Number:      | UR:       | Name: |
| DOB:                               | Initials: |       |

**Visit 2**

**At 3 Months –Townsville hospital Diabetes clinic**

**Initial assessment**

|    |                                                                                                                                                                   |                                                          |
|----|-------------------------------------------------------------------------------------------------------------------------------------------------------------------|----------------------------------------------------------|
| 1  | Is the participant in the case or control group?                                                                                                                  | Case<br><br>Control                                      |
| 2  | Does the participant have a present plantar foot ulcer?                                                                                                           | Yes <input type="checkbox"/> No                          |
| 3  | Does the participant have a newly formed plantar ulcer?                                                                                                           | Yes <input type="checkbox"/> No                          |
| 3A | Has a plantar ulcer healed in this duration?                                                                                                                      | <b>Yes No</b>                                            |
| 4  | Does the participant give consent for biopsy of the ulcer/ulcers?                                                                                                 | <input type="checkbox"/> Yes <input type="checkbox"/> No |
| 5  | Has the participant's diabetes medication or dose changed since last visit?<br>Please note changes:<br>1.<br>2.<br>3.<br>4.<br>5.                                 | <input type="checkbox"/> Yes <input type="checkbox"/> No |
| 6  | Has the participant increased/decreased treatment frequency for the ulcer?                                                                                        | <input type="checkbox"/> Yes <input type="checkbox"/> No |
|    | If yes, how so?                                                                                                                                                   | Increased<br><br>Decreased                               |
| 7  | Has the patient commenced any new treatment for a disease process or as a part of a health measure?<br>I.e.- Dialysis, HRT, Warfarin treatment, Radiation therapy | <input type="checkbox"/> Yes <input type="checkbox"/> No |
|    | Please state _____                                                                                                                                                |                                                          |
| 8  | Has the patient commenced or is awaiting any surgical procedure?                                                                                                  | <input type="checkbox"/> Yes <input type="checkbox"/> No |
|    | Please state _____                                                                                                                                                |                                                          |
| 9  | Has the patient increased or decreased weight-bearing activity levels in the last 3 months?                                                                       | <input type="checkbox"/> Yes <input type="checkbox"/> No |
|    | Please state new number of hours per week, on weight-bearing activities?<br>_____ hrs                                                                             |                                                          |

| Diabetes and Foot ulceration Study |           |       |
|------------------------------------|-----------|-------|
| Unique Identification Number:      | UR:       | Name: |
| DOB:                               | Initials: |       |

|              |                                                                                                                                                                                                                                   |
|--------------|-----------------------------------------------------------------------------------------------------------------------------------------------------------------------------------------------------------------------------------|
|              | <p>Please state the new number of hours per week weight-bearing but not doing any activity (i.e. standing)</p> <p>_____ hrs</p> <p>Please state the number of hours completely not weight bearing (Sitting)</p> <p>_____ hrs</p>  |
| <b>Total</b> | <p>Total hours in three months standing (weight bearing)</p> <p>_____ hrs</p> <p>Total hours in three months walking (weight bearing)</p> <p>_____ hrs</p> <p>Total hours in three months non-weight bearing</p> <p>_____ hrs</p> |

### Physical Measurements

|                                                                                                |                                 |
|------------------------------------------------------------------------------------------------|---------------------------------|
| Weight: <input type="text"/> <input type="text"/> <input type="text"/> <input type="text"/> kg | Waist circumference<br>_____ cm |
| BMI: _____                                                                                     | Hip circumference _____ cm      |

### Podiatric Examination- To be conducted using a goniometer for values for ROM

| Examination                                                 | Right                                           |        |   | Left                                            |        |   |
|-------------------------------------------------------------|-------------------------------------------------|--------|---|-------------------------------------------------|--------|---|
| Ankle Joint ROM (deg)                                       |                                                 |        |   |                                                 |        |   |
| STJ ROM (deg)                                               |                                                 |        |   |                                                 |        |   |
| 1 <sup>st</sup> MTPJ ROM (deg)                              |                                                 |        |   |                                                 |        |   |
| HAV- Hallux Abducto Valgus Deformity Stage Manchester Scale |                                                 |        |   |                                                 |        |   |
| Foot type                                                   | Pes Planus<br>Pes Cavus<br>Regular Arch Contour |        |   | Pes Planus<br>Pes Cavus<br>Regular Arch Contour |        |   |
| Muscle strength DF/PF                                       | 1<br>4                                          | 2<br>5 | 3 | 1<br>4                                          | 2<br>5 | 3 |
| Muscle Strength Inv/Evr                                     | 1<br>4                                          | 2<br>5 | 3 | 1<br>4                                          | 2<br>5 | 3 |
| Muscle Strength Abduction/Adduction                         | 1<br>4                                          | 2<br>5 | 3 | 1<br>4                                          | 2<br>5 | 3 |

| Diabetes and Foot ulceration Study |           |       |
|------------------------------------|-----------|-------|
| Unique Identification Number:      | UR:       | Name: |
| DOB:                               | Initials: |       |

|                                                           |                                                                                                                                                                                                     |                                                                                                                                                                                                     |
|-----------------------------------------------------------|-----------------------------------------------------------------------------------------------------------------------------------------------------------------------------------------------------|-----------------------------------------------------------------------------------------------------------------------------------------------------------------------------------------------------|
| Lesser toe deformities (Claw toe, Hammer Toe, Mallet toe) | Claw Toe<br>Hammer Toe<br>Mallet Toe                                                                                                                                                                | Claw Toe<br>Hammer Toe<br>Mallet Toe                                                                                                                                                                |
| Plantar hyperkeratosis locations                          | Plantar first metatarsal head<br>Plantar PMA 1-3<br>Plantar Apex of toes<br>Plantar Calcaneal area<br>Medial Hallux<br>Plantar 5 <sup>th</sup> metatarsal head<br>Plantar PMA 4-5<br>Plantar Cuboid | Plantar first metatarsal head<br>Plantar PMA 1-3<br>Plantar Apex of toes<br>Plantar Calcaneal area<br>Medial Hallux<br>Plantar 5 <sup>th</sup> metatarsal head<br>Plantar PMA 4-5<br>Plantar Cuboid |
| Lunge test                                                | <35 Degrees<br>35 Degrees<br>>35 Degrees                                                                                                                                                            | <35 Degrees<br>35 Degrees<br>>35 Degrees                                                                                                                                                            |
| MSRT                                                      | 1            2            3<br>4            5                                                                                                                                                       | 1            2            3<br>4            5                                                                                                                                                       |
| Jack's test                                               | Positive<br>Negative                                                                                                                                                                                | Positive<br>Negative                                                                                                                                                                                |

Does the patient have a present plantar foot ulcer?

Yes

No

If yes, please fill out planimetry and ulcer assessment table below.

**Planimetry and Ulcer assessment**

| <b><u>Investigation</u></b>                                | <b><u>Ulcer 1</u></b>                              | <b><u>Ulcer 2</u></b>                                    | <b><u>Ulcer 3</u></b>                              |
|------------------------------------------------------------|----------------------------------------------------|----------------------------------------------------------|----------------------------------------------------|
| Ulcer Location                                             |                                                    |                                                          |                                                    |
| Estimated duration of ulcer<br>In weeks                    |                                                    |                                                          |                                                    |
| Planimetric depth<br>cm3                                   |                                                    |                                                          |                                                    |
| Planimetry<br>Length cm<br>Width cm<br>Area cm             | Length _____ cm<br>Width _____ cm<br>Area _____ cm | Length _____ cm<br>Width _____ cm<br>Area _____ cm       | Length _____ cm<br>Width _____ cm<br>Area _____ cm |
| Wound exudate/<br>discharge present<br>and type of exudate | Mild            Serous<br>Moderate<br>Purulent     | Mild            Serous<br>Moderate      Purulent<br>High | Mild<br>Serous<br>Moderate                         |

| Diabetes and Foot ulceration Study |           |       |
|------------------------------------|-----------|-------|
| Unique Identification Number:      | UR:       | Name: |
| DOB:                               | Initials: |       |

|                                                                                               |                                                                                                                   |                                                                                                                   |                                                                                                                   |
|-----------------------------------------------------------------------------------------------|-------------------------------------------------------------------------------------------------------------------|-------------------------------------------------------------------------------------------------------------------|-------------------------------------------------------------------------------------------------------------------|
|                                                                                               | High<br>Haemoserous                                                                                               | Haemoserous                                                                                                       | Purulent<br>High<br>Haemoserous                                                                                   |
| UTWCS Grading                                                                                 |                                                                                                                   |                                                                                                                   |                                                                                                                   |
| Wound Bed                                                                                     | Necrotic<br>Granulating<br>Epithelializing<br>Sloughy<br>Pale<br>Hypergranulating<br>Bone                         | Necrotic<br>Granulating<br>Epithelializing<br>Sloughy<br>Pale<br>Hypergranulating<br>Bone                         | Necrotic<br>Granulating<br>Epithelializing<br>Sloughy<br>Pale<br>Hypergranulating<br>Bone                         |
| Wound Edge                                                                                    | Regular<br>Irregular<br>Undermined<br>Rolling                                                                     | Regular<br>Irregular<br>Undermined<br>Rolling                                                                     | Regular<br>Irregular<br>Undermined<br>Rolling                                                                     |
| Sinus Formation<br>Yes          No                                                            | Yes          No<br>mm _____                                                                                       | Yes          No<br>mm _____                                                                                       | Yes          No<br>mm _____                                                                                       |
| Is the ulcer infected?<br>-Conduct Wound<br>Swab for presence of<br>pathological<br>microbes. | Yes<br><br>No                                                                                                     | Yes<br><br>No                                                                                                     | Yes<br><br>No                                                                                                     |
| Type of organism<br>causing infection (As<br>per pathology test)                              |                                                                                                                   |                                                                                                                   |                                                                                                                   |
| Type of ulcer<br>(Neuropathic,<br>Neuroischemic)                                              | Neuropathic<br><br>Neuroischemic                                                                                  | Neuropathic<br><br>Neuroischemic                                                                                  | Neuropathic<br><br>Neuroischemic                                                                                  |
| Surrounding Skin                                                                              | Macerated<br>Hyperkeratotic<br>Indurated<br>Normal/healthy<br>Fragile<br>Erythematous<br>Oedematous<br>Anhidrotic | Macerated<br>Hyperkeratotic<br>Indurated<br>Normal/healthy<br>Fragile<br>Erythematous<br>Oedematous<br>Anhidrotic | Macerated<br>Hyperkeratotic<br>Indurated<br>Normal/healthy<br>Fragile<br>Erythematous<br>Oedematous<br>Anhidrotic |
| Orthoses Used?                                                                                | Yes      No                                                                                                       | Yes      No                                                                                                       | Yes      No                                                                                                       |
| Offloading shoe or<br>boot-walker used?                                                       | Yes      No                                                                                                       | Yes      No                                                                                                       | Yes      No                                                                                                       |

| Diabetes and Foot ulceration Study |           |       |
|------------------------------------|-----------|-------|
| Unique Identification Number:      | UR:       | Name: |
| DOB:                               | Initials: |       |

| Type of Off-loading Device                                              | TCC<br>Foot Orthoses<br>AFO<br>Padding<br>No offloading | TCC<br>Foot Orthoses<br>AFO<br>Padding<br>No offloading | TCC<br>Foot Orthoses<br>AFO<br>Padding<br>No offloading |
|-------------------------------------------------------------------------|---------------------------------------------------------|---------------------------------------------------------|---------------------------------------------------------|
| How often is the ulcer seen by a health professional in a month? (X 3 ) |                                                         |                                                         |                                                         |
| How often is the ulcer dressing changed per month? (x 3)                |                                                         |                                                         |                                                         |

**Is a photograph of the ulcer taken?**                      **Yes      No**

#### **Footwear Assessment**

What type of shoe do you currently use most of the time?

**1. Sports   2. Dress   3.Diabetic special shoe   4.Custom made shoe   5.Thongs  
6.None**

On average per week how many days do you use this shoe?

Days out of seven?                      **/7**

Do you wear orthoses?   **Yes      No**                      **Custom   Off-the shelf**

#### **Blood Collection – Pathology**

**Refer patient to SNP pathology for blood collection.**

|                                                                    |                                                                                 |
|--------------------------------------------------------------------|---------------------------------------------------------------------------------|
| Blood collection form given to patient?                            | <input type="checkbox"/> Yes <input type="checkbox"/> No                        |
| Date of Collection                                                 | <input type="text"/> / <input type="text"/> / <input type="text"/> (dd/mm/yyyy) |
| Haemoglobin <input type="text"/> g/L                               | LD <input type="text"/> U/L                                                     |
| WCC <input type="text"/> . <input type="text"/> 10 <sup>9</sup> /L | Cholesterol <input type="text"/> . <input type="text"/> mmol/L                  |
| Platelets <input type="text"/> 10 <sup>9</sup> /L                  | Triglyceride <input type="text"/> . <input type="text"/> mmol/L                 |
| Fibrinogen <input type="text"/> . <input type="text"/> g/L         | HDL <input type="text"/> . <input type="text"/> mmol/L                          |
| Sodium <input type="text"/> mmol/L                                 | LDL <input type="text"/> . <input type="text"/> mmol/L                          |



| Diabetes and Foot ulceration Study |           |       |
|------------------------------------|-----------|-------|
| Unique Identification Number:      | UR:       | Name: |
| DOB:                               | Initials: |       |

|                                                                |                              |
|----------------------------------------------------------------|------------------------------|
| Potassium □.□ mmol/L                                           | CRP □□□mg/L                  |
| Urea □□□ mmol/L                                                | Chloride □□□mmol/L           |
| Creatinine □□□ μmol/L                                          | Bicarbonate □□mmol/L         |
| eGFR □□□mL/min/1.73m <sup>2</sup>                              | Calcium □.□□mmol/L           |
| Fasting Glucose □□.□μmol/L                                     | Phosphorus □.□mmol/L         |
| HAB1C _____%                                                   | Total protein □□g/L          |
| CRP _____mg/L                                                  | Hematocrit □.□□mg/dL         |
| ESR _____mm/hr                                                 | Neuts □.□10 <sup>9</sup> /L  |
| Parathyroid Hormone _____pg/ml                                 | Lymphs □.□10 <sup>9</sup> /L |
| <b>N-(carboxymethyl) lysine (CML)</b><br>_____                 | Monos □.□10 <sup>9</sup> /L  |
| <b>Non-CML advanced glycation end products (AGEs)</b><br>_____ | Eos □.□10 <sup>9</sup> /L    |
| <b>Pentosidine</b><br>_____                                    | Baso □.□□10 <sup>9</sup> /L  |
| <b>Homocystine</b>                                             |                              |

### Note

Quality of life questionnaire to be handed to the patient at this point to fill out then the details and dates for gait assessment visit and follow-up visit on a follow-up card should be given to the patient. Contact details are then recorded separately.

**Pedometer Given to Patient?    Yes    No**

| Diabetes and Foot ulceration Study |           |       |
|------------------------------------|-----------|-------|
| Unique Identification Number:      | UR:       | Name: |
| DOB:                               | Initials: |       |

## Vascular Biology Unit Blood Sample Storage Form

### Blood Collection –For VBU Biomarker Staff to complete

|                                                                           |                                                                                                                                                                                                                  |
|---------------------------------------------------------------------------|------------------------------------------------------------------------------------------------------------------------------------------------------------------------------------------------------------------|
| Has blood been collected for study analysis? (Check with SNP and Ratnesh) | <input type="checkbox"/> Yes <input type="checkbox"/> No                                                                                                                                                         |
| Date of Collection                                                        | <input type="text"/> <input type="text"/> / <input type="text"/> <input type="text"/> <input type="text"/> / <input type="text"/> <input type="text"/> <input type="text"/> <input type="text"/><br>(dd/mm/yyyy) |
| 2 x SST                                                                   | <input type="checkbox"/> Yes <input type="checkbox"/> No                                                                                                                                                         |
| 2 x EDTA                                                                  | <input type="checkbox"/> Yes <input type="checkbox"/> No                                                                                                                                                         |
| 1 x Sodium Citrate                                                        | <input type="checkbox"/> Yes <input type="checkbox"/> No                                                                                                                                                         |

### Sample Storage

|                                                                            |                                                               |                                                                                                                                                                                                                  |                         |
|----------------------------------------------------------------------------|---------------------------------------------------------------|------------------------------------------------------------------------------------------------------------------------------------------------------------------------------------------------------------------|-------------------------|
| Have study bloods been processed and stored according to the lab manual?   |                                                               | <input type="checkbox"/> Yes <input type="checkbox"/> No*<br>*If NO, record a Protocol Deviation                                                                                                                 |                         |
| Date of Processing                                                         |                                                               | <input type="text"/> <input type="text"/> / <input type="text"/> <input type="text"/> <input type="text"/> / <input type="text"/> <input type="text"/> <input type="text"/> <input type="text"/><br>(dd/mm/yyyy) |                         |
|                                                                            | Number of Samples:                                            | Have samples been stored at the Protocol defined temperature?                                                                                                                                                    | Location of Samples     |
| Serum<br>(from SST tubes)                                                  | <input type="text"/> <input type="text"/><br>(Store at -80°C) | <input type="checkbox"/> Yes <input type="checkbox"/> No*<br>*If NO, record a Protocol Deviation                                                                                                                 | Box #<br><br>Position # |
| EDTA Plasma<br>(Purple top EDTA tubes)                                     | <input type="text"/> <input type="text"/><br>(Store at -80°C) | <input type="checkbox"/> Yes <input type="checkbox"/> No*<br>*If NO, record a Protocol Deviation                                                                                                                 | Box #<br><br>Position # |
| EDTA RBC Pellet<br>(Remaining pellet from EDTA tubes with plasma removed ) | <input type="text"/> <input type="text"/><br>(Store at -80°C) | <input type="checkbox"/> Yes <input type="checkbox"/> No*<br>*If NO, record a Protocol Deviation                                                                                                                 | Box #<br><br>Position # |
| Citrate Plasma<br>(Blue top Citrate tubes)                                 | <input type="text"/> <input type="text"/><br>(Store at -80°C) | <input type="checkbox"/> Yes <input type="checkbox"/> No*<br>*If NO, record a Protocol Deviation                                                                                                                 | Box #<br><br>Position # |

### Notes:

| Diabetes and Foot ulceration Study |           |       |
|------------------------------------|-----------|-------|
| Unique Identification Number:      | UR:       | Name: |
| DOB:                               | Initials: |       |

## **Biopsy Procedure Documentation Sheet- Foot ulcer patients Only!**

**Has informed consent been obtained for biopsy?**      Yes      No

**Have VBU staff been advised about time of biopsy collection?**      Yes      No

**Appropriate transport medium organised?**      Yes      No

### **Doctors Statement**

I have explained

- The patient's condition
- Need for the biopsy
- The procedure and the risk
- Relevant treatment options and their risks
- Likely consequences if those risks occur
- The significant risks and problems specific to this patient.

I have given the patient/substitute decision maker an opportunity to

- Ask questions about any of the above matters
- Raise any other concerns

Which I have answered as fully as possible. I am of the opinion that the patient/ substitute decision maker understands the above information.

Name of Doctor

Designation

Date

Signature

**Biopsy Sample appropriately stored at the VBU?**      Yes      No

**Date of storage of Sample-**

### **Part 2: Gait, Pressure and Biomechanical Assessment.**

| Diabetes and Foot ulceration Study |           |       |
|------------------------------------|-----------|-------|
| Unique Identification Number:      | UR:       | Name: |
| DOB:                               | Initials: |       |

## **Site- James Cook University, Gait Laboratory.**

### **Physical Measurements**

|                       |    |                                                                                              |
|-----------------------|----|----------------------------------------------------------------------------------------------|
| ASIS Breadth          | cm | Mass: <input type="text"/> <input type="text"/> <input type="text"/> <input type="text"/> kg |
| Left Leg length       | cm | Height <input type="text"/> cm                                                               |
| Left Knee diameter    | cm |                                                                                              |
| Left malleolus width  | cm |                                                                                              |
| Right Leg length      | cm |                                                                                              |
| Right Knee diameter   | cm |                                                                                              |
| Right malleolus width | cm |                                                                                              |

### **Testing protocol**

Measure up: ☐

EMG prep: ☐

MVC: ☐

Reflective markers prep ☐

Static capture ☐

10 walking trails ☐

Treadmill walking 4 minutes ☐

(Capture only 2:00 onwards)s

Self-Selected Walking Speed \_\_\_\_\_ km/hr.

Plantar pressure capture (3 walks) ☐

**FINISHED**

| Diabetes and Foot ulceration Study |           |       |
|------------------------------------|-----------|-------|
| Unique Identification Number:      | UR:       | Name: |
| DOB:                               | Initials: |       |

| <b><u>Primary Outcome measure</u></b>           | <b><u>Measurement</u></b>                                                                                                                                                                                                                     | <b><u>Left</u></b> | <b><u>Right</u></b> |
|-------------------------------------------------|-----------------------------------------------------------------------------------------------------------------------------------------------------------------------------------------------------------------------------------------------|--------------------|---------------------|
| Peak plantar pressure (N/Cm <sup>2</sup> )      | Medial Heel-<br>Lateral Heel<br>Medial Forefoot<br>Lateral Forefoot                                                                                                                                                                           |                    |                     |
| Pressure time integral (N/Cm <sup>2</sup> ) X s | Medial Heel-<br>Lateral Heel<br>Medial Forefoot<br>Lateral Forefoot                                                                                                                                                                           |                    |                     |
| Time of peak occurrence EMG (%)                 | Vastus Lateralis Lat<br>Gastrocnemius<br>Tibialis Anterior                                                                                                                                                                                    |                    |                     |
| GRF (N/Kg) <sup>D</sup>                         | Vertical<br>Med/Lat<br>Ant/Post                                                                                                                                                                                                               |                    |                     |
| Oxford Foot Model (deg)                         | Hindfoot Sag<br>Hindfoot Fron<br>Hindfoot T.V<br>Forefoot Sag<br>Forefoot Fron<br>Forefoot T.V                                                                                                                                                |                    |                     |
| Lower Limb Kinematics                           | <u>Stance Phase</u><br>Max hip Flex<br>Max hip Ext<br>Max Knee Flex<br>Max Knee Ext<br>Max Ankle DF<br>Max Ankle PF<br><br><u>Swing Phase</u><br>Max hip Flex<br>Max hip Ext<br>Max Knee Flex<br>Max Knee Ext<br>Max Ankle DF<br>Max Ankle PF |                    |                     |

## **Data-Sets Post-Data extraction**

### **EMG During Gait Assessment**

| Diabetes and Foot ulceration Study |           |       |
|------------------------------------|-----------|-------|
| Unique Identification Number:      | UR:       | Name: |
| DOB:                               | Initials: |       |

### **Maximum Voluntary Contraction**

| <u>Tibialis Anterior</u> | <u>Medial Gastroc</u> | <u>Lateral Gastroc</u> | <u>Peroneus Longus</u> | <u>Soleus</u> | <u>VMO</u> | <u>Semiten</u> |
|--------------------------|-----------------------|------------------------|------------------------|---------------|------------|----------------|
| <u>Right</u>             |                       |                        |                        |               |            |                |
| <u>Left</u>              |                       |                        |                        |               |            |                |

| (%)                    | <u>Tibialis Anterior</u> | <u>Medial Gastroc</u> | <u>Lateral Gastroc</u> | <u>Peroneus Longus</u> | <u>Soleus</u> | <u>VMO</u> | <u>Semiten</u> |
|------------------------|--------------------------|-----------------------|------------------------|------------------------|---------------|------------|----------------|
| <u>Peak Activation</u> |                          |                       |                        |                        |               |            |                |
| Left                   |                          |                       |                        |                        |               |            |                |
| Right                  |                          |                       |                        |                        |               |            |                |
| <u>Contact</u>         |                          |                       |                        |                        |               |            |                |
| Left                   |                          |                       |                        |                        |               |            |                |
| Right                  |                          |                       |                        |                        |               |            |                |
| <u>Stance</u>          |                          |                       |                        |                        |               |            |                |
| Left                   |                          |                       |                        |                        |               |            |                |
| Right                  |                          |                       |                        |                        |               |            |                |
| <u>Toe-off</u>         |                          |                       |                        |                        |               |            |                |
| Left                   |                          |                       |                        |                        |               |            |                |
| Right                  |                          |                       |                        |                        |               |            |                |
| <u>Swing</u>           |                          |                       |                        |                        |               |            |                |
| Left                   |                          |                       |                        |                        |               |            |                |
| Right                  |                          |                       |                        |                        |               |            |                |

### **Treadmill gait assessment**

| Assessment | Parameter | Left | Right |
|------------|-----------|------|-------|
|------------|-----------|------|-------|

| Diabetes and Foot ulceration Study |           |       |
|------------------------------------|-----------|-------|
| Unique Identification Number:      | UR:       | Name: |
| DOB:                               | Initials: |       |

|                         |                                                                                                                                                                                                                                                             |  |  |
|-------------------------|-------------------------------------------------------------------------------------------------------------------------------------------------------------------------------------------------------------------------------------------------------------|--|--|
| Oxford Foot Model (deg) | Hindfoot Sag<br>Hindfoot Fron<br>Hindfoot T.V<br>Forefoot Sag<br>Forefoot Fron<br>Forefoot T.V                                                                                                                                                              |  |  |
| Lower Limb Kinematics   | <b><u>Stance Phase</u></b><br>Max hip Flex<br>Max hip Ext<br>Max Knee Flex<br>Max Knee Ext<br>Max Ankle DF<br>Max Ankle PF<br><br><b><u>Swing Phase</u></b><br>Max hip Flex<br>Max hip Ext<br>Max Knee Flex<br>Max Knee Ext<br>Max Ankle DF<br>Max Ankle PF |  |  |

### **EMG During Treadmill Gait**

| <u>Muscle</u>                           | <u>Tibialis Anterior</u> | <u>Medial Gastroc</u> | <u>Lateral Gastroc</u> | <u>Peroneus Longus</u> | <u>Soleus</u> | <u>VMO</u> | <u>Semitendinosus</u> |
|-----------------------------------------|--------------------------|-----------------------|------------------------|------------------------|---------------|------------|-----------------------|
| <u>Peak Activation</u><br>Left<br>Right |                          |                       |                        |                        |               |            |                       |
| <u>MVC</u><br>Left<br>Right             |                          |                       |                        |                        |               |            |                       |
| <u>Contact</u><br>Left<br>Right         |                          |                       |                        |                        |               |            |                       |
| <u>Stance</u><br>Left<br>Right          |                          |                       |                        |                        |               |            |                       |

| Diabetes and Foot ulceration Study |           |       |
|------------------------------------|-----------|-------|
| Unique Identification Number:      | UR:       | Name: |
| DOB:                               | Initials: |       |

|                |  |  |  |  |  |  |  |
|----------------|--|--|--|--|--|--|--|
| <u>Toe-off</u> |  |  |  |  |  |  |  |
| Left           |  |  |  |  |  |  |  |
| Right          |  |  |  |  |  |  |  |
| <u>Swing</u>   |  |  |  |  |  |  |  |
| Left           |  |  |  |  |  |  |  |
| Right          |  |  |  |  |  |  |  |

### **Summary of Findings**

|                                                                                       |     |    |
|---------------------------------------------------------------------------------------|-----|----|
| Is the initial ulcer still present?                                                   | YES | NO |
| Has the ulcer size increased?                                                         | YES | NO |
| Has the ulcer size decreased?                                                         | YES | NO |
| Is there formation of a new ulcer?                                                    | YES | NO |
| Has the ulcer completely healed?                                                      | YES | NO |
| Is there a decrease in glycaemic control?                                             | YES | NO |
| Is there a decrease in renal function?                                                | YES | NO |
| Has the patient commenced dialysis?                                                   | YES | NO |
| Is there increased AGE formation present?                                             | YES | NO |
| Are there differences in the ROM of joints?                                           | YES | NO |
| Is there deterioration of vascular function?                                          | YES | NO |
| Is there a deterioration of neurological function?                                    | YES | NO |
| Has there been a reduction in treatment frequency?                                    | YES | NO |
| Has there been an increase in treatment frequency?                                    | YES | NO |
| Was a biopsy conducted?                                                               | YES | NO |
| Is there infection present?                                                           | YES | NO |
| Has haematological status deteriorated critically? I.e.- Lipid profile, WCC, CRP, ESR | YES | NO |
| Is the participant still suitable for the study?                                      | YES | NO |
| Next visit date provided?                                                             | YES | NO |

**If the participant is no longer suitable for the study, please send a letter of thanks for being involved in the study, otherwise provide date and time of next consultation.**



| Diabetes and Foot ulceration Study |           |       |
|------------------------------------|-----------|-------|
| Unique Identification Number:      | UR:       | Name: |
| DOB:                               | Initials: |       |

Date and time of next consultation \_\_\_\_\_

1. Blood Collection Form Given
2. Questionnaires Collected (4)
3. Review-date organised
4. Pedometer calibrated and given?
5. Instructions given on Pedometer return?

## **Notes**

**Visit 3**  
**At 6 Months**

**Initial assessment**

| Diabetes and Foot ulceration Study |           |       |
|------------------------------------|-----------|-------|
| Unique Identification Number:      | UR:       | Name: |
| DOB:                               | Initials: |       |

|    |                                                                                                                                                                                                                 |                                                          |
|----|-----------------------------------------------------------------------------------------------------------------------------------------------------------------------------------------------------------------|----------------------------------------------------------|
| 1  | Is the participant in the case or control group?                                                                                                                                                                | Case<br>Control                                          |
| 2  | Does the participant have a present plantar foot ulcer?                                                                                                                                                         | Yes <input type="checkbox"/> No                          |
| 3  | Does the participant have a newly formed plantar ulcer?                                                                                                                                                         | Yes <input type="checkbox"/> No                          |
| 3A | Has a plantar ulcer healed in this duration?                                                                                                                                                                    | Yes No                                                   |
| 4  | Does the participant give consent for biopsy of the ulcer/ulcers?                                                                                                                                               | <input type="checkbox"/> Yes <input type="checkbox"/> No |
| 5  | Has the participant's diabetes medication or dose changed since last visit?<br>Please note changes:<br>1.<br>2.<br>3.<br>4.<br>5.                                                                               | <input type="checkbox"/> Yes <input type="checkbox"/> No |
| 6  | Has the participant increased/decreased treatment frequency for the ulcer?                                                                                                                                      | <input type="checkbox"/> Yes <input type="checkbox"/> No |
|    | If yes, how so?                                                                                                                                                                                                 | Increased<br>Decreased                                   |
| 7  | Has the patient commenced any new treatment for a disease process or as a part of a health measure?<br>I.e.- Dialysis, HRT, Warfarin treatment, Radiation therapy                                               | <input type="checkbox"/> Yes <input type="checkbox"/> No |
|    | Please state _____                                                                                                                                                                                              |                                                          |
| 8  | Has the patient commenced or is awaiting any surgical procedure?                                                                                                                                                | Yes <input type="checkbox"/> No                          |
|    | Please state _____                                                                                                                                                                                              |                                                          |
| 9  | Has the patient increased or decreased weight-bearing activity levels in the last 3 months?                                                                                                                     | Yes <input type="checkbox"/> No                          |
|    | Please state new number of hours per week, on weight-bearing activities?<br>_____ hrs<br><br>Please state the new number of hours per week weight-bearing but not doing any activity (ie standing)<br>_____ hrs |                                                          |

| Diabetes and Foot ulceration Study |           |       |
|------------------------------------|-----------|-------|
| Unique Identification Number:      | UR:       | Name: |
| DOB:                               | Initials: |       |

|              |                                                                                                                                                                                                                |
|--------------|----------------------------------------------------------------------------------------------------------------------------------------------------------------------------------------------------------------|
|              | Please state the number of hours completely not weight bearing (Sitting)<br>_____ hrs                                                                                                                          |
| <b>Total</b> | Total hours in three months standing (weight bearing)<br>_____ hrs<br><br>Total hours in three months walking (weight bearing)<br>_____ hrs<br><br>Total hours in three months non-weight bearing<br>_____ hrs |

### **Physical Measurements**

|                                                                                                |                                 |
|------------------------------------------------------------------------------------------------|---------------------------------|
| Weight: <input type="text"/> <input type="text"/> <input type="text"/> <input type="text"/> kg | Waist circumference<br>_____ cm |
| BMI: _____                                                                                     | Hip circumference _____ cm      |

### **Podiatric Examination-** To be conducted using a goniometer for values for ROM

| Examination                                                 | Right                                            | Left                                             |
|-------------------------------------------------------------|--------------------------------------------------|--------------------------------------------------|
| Ankle Joint ROM (deg)                                       |                                                  |                                                  |
| STJ ROM (deg)                                               |                                                  |                                                  |
| 1 <sup>st</sup> MTPJ ROM (deg)                              |                                                  |                                                  |
| HAV- Hallux Abducto Valgus Deformity Stage Manchester Scale |                                                  |                                                  |
| Foot type                                                   | Pes Planus<br>Pes Cavus<br>Regular Arch Contour  | Pes Planus<br>Pes Cavus<br>Regular Arch Contour  |
| Muscle strength DF/PF                                       | 1      2      3<br>4      5                      | 1      2      3<br>4      5                      |
| Muscle Strength Inv/Evr                                     | 1      2      3<br>4      5                      | 1      2      3<br>4      5                      |
| Muscle Strength Abduction/Adduction                         | 1      2      3<br>4      5                      | 1      2      3<br>4      5                      |
| Lesser toe deformities (Claw toe, Hammer Toe, Mallet toe)   | Claw Toe<br>Hammer Toe<br>Mallet Toe             | Claw Toe<br>Hammer Toe<br>Mallet Toe             |
| Plantar hyperkeratosis locations                            | Plantar first metatarsal head<br>Plantar PMA 1-3 | Plantar first metatarsal head<br>Plantar PMA 1-3 |

| Diabetes and Foot ulceration Study |           |       |
|------------------------------------|-----------|-------|
| Unique Identification Number:      | UR:       | Name: |
| DOB:                               | Initials: |       |

|             |                                                                                                                                                 |                                                                                                                                                 |
|-------------|-------------------------------------------------------------------------------------------------------------------------------------------------|-------------------------------------------------------------------------------------------------------------------------------------------------|
|             | Plantar Apex of toes<br>Plantar Calcaneal area<br>Medial Hallux<br>Plantar 5 <sup>th</sup> metatarsal head<br>Plantar PMA 4-5<br>Plantar Cuboid | Plantar Apex of toes<br>Plantar Calcaneal area<br>Medial Hallux<br>Plantar 5 <sup>th</sup> metatarsal head<br>Plantar PMA 4-5<br>Plantar Cuboid |
| Lunge test  | <35 Degrees<br>35 Degrees<br>>35 Degrees                                                                                                        | <35 Degrees<br>35 Degrees<br>>35 Degrees                                                                                                        |
| MSRT        | 1            2            3<br>4            5                                                                                                   | 1            2            3<br>4            5                                                                                                   |
| Jack's test | Positive<br>Negative                                                                                                                            | Positive<br>Negative                                                                                                                            |

Does the patient have a present plantar foot ulcer?

Yes

No

If yes, please fill out planimetry and ulcer assessment table below.

**Planimetry and Ulcer assessment**

| <u>Investigation</u>                                       | <u>Ulcer 1</u>                                                        | <u>Ulcer 2</u>                                                        | <u>Ulcer 3</u>                                                |
|------------------------------------------------------------|-----------------------------------------------------------------------|-----------------------------------------------------------------------|---------------------------------------------------------------|
| Ulcer Location                                             |                                                                       |                                                                       |                                                               |
| Estimated duration of ulcer<br>In weeks                    |                                                                       |                                                                       |                                                               |
| Planimetric depth<br>cm3                                   |                                                                       |                                                                       |                                                               |
| Planimetry<br>Length cm<br>Width cm<br>Area cm             | Length _____ cm<br>Width _____ cm<br>Area _____ cm                    | Length _____ cm<br>Width _____ cm<br>Area _____ cm                    | Length _____ cm<br>Width _____ cm<br>Area _____ cm            |
| Wound exudate/<br>discharge present<br>and type of exudate | Mild            Serous<br>Moderate<br>Purulent<br>High<br>Haemoserous | Mild            Serous<br>Moderate    Purulent<br>High<br>Haemoserous | Mild<br>Serous<br>Moderate<br>Purulent<br>High<br>Haemoserous |
| UTWCS Grading                                              |                                                                       |                                                                       |                                                               |

| Diabetes and Foot ulceration Study |           |       |
|------------------------------------|-----------|-------|
| Unique Identification Number:      | UR:       | Name: |
| DOB:                               | Initials: |       |

|                                                                                               |                                                                                                                   |                                                                                                                   |                                                                                                                   |
|-----------------------------------------------------------------------------------------------|-------------------------------------------------------------------------------------------------------------------|-------------------------------------------------------------------------------------------------------------------|-------------------------------------------------------------------------------------------------------------------|
| Wound Bed                                                                                     | Necrotic<br>Granulating<br>Epithelializing<br>Sloughy<br>Pale<br>Hypergranulating<br>Bone                         | Necrotic<br>Granulating<br>Epithelializing<br>Sloughy<br>Pale<br>Hypergranulating<br>Bone                         | Necrotic<br>Granulating<br>Epithelializing<br>Sloughy<br>Pale<br>Hypergranulating<br>Bone                         |
| Wound Edge                                                                                    | Regular<br>Irregular<br>Undermined<br>Rolling                                                                     | Regular<br>Irregular<br>Undermined<br>Rolling                                                                     | Regular<br>Irregular<br>Undermined<br>Rolling                                                                     |
| Sinus Formation<br>Yes      No                                                                | Yes      No<br>mm _____                                                                                           | Yes      No<br>mm _____                                                                                           | Yes      No<br>mm _____                                                                                           |
| Is the ulcer infected?<br>-Conduct Wound<br>Swab for presence of<br>pathological<br>microbes. | Yes<br><br>No                                                                                                     | Yes<br><br>No                                                                                                     | Yes<br><br>No                                                                                                     |
| Type of organism<br>causing infection (As<br>per pathology test)                              |                                                                                                                   |                                                                                                                   |                                                                                                                   |
| Type of ulcer<br>(Neuropathic,<br>Neuroischemic)                                              | Neuropathic<br><br>Neuroischemic                                                                                  | Neuropathic<br><br>Neuroischemic                                                                                  | Neuropathic<br><br>Neuroischemic                                                                                  |
| Surrounding Skin                                                                              | Macerated<br>Hyperkeratotic<br>Indurated<br>Normal/healthy<br>Fragile<br>Erythematous<br>Oedematous<br>Anhidrotic | Macerated<br>Hyperkeratotic<br>Indurated<br>Normal/healthy<br>Fragile<br>Erythematous<br>Oedematous<br>Anhidrotic | Macerated<br>Hyperkeratotic<br>Indurated<br>Normal/healthy<br>Fragile<br>Erythematous<br>Oedematous<br>Anhidrotic |
| Orthoses Used?                                                                                | Yes      No                                                                                                       | Yes      No                                                                                                       | Yes      No                                                                                                       |
| Offloading shoe or<br>boot-walker used?                                                       | Yes      No                                                                                                       | Yes      No                                                                                                       | Yes      No                                                                                                       |
| Type of Off-loading<br>Device                                                                 | TCC<br>Foot Orthoses<br>AFO<br>Padding<br>No offloading                                                           | TCC<br>Foot Orthoses<br>AFO<br>Padding<br>No offloading                                                           | TCC<br>Foot Orthoses<br>AFO<br>Padding<br>No offloading                                                           |

| Diabetes and Foot ulceration Study |           |       |
|------------------------------------|-----------|-------|
| Unique Identification Number:      | UR:       | Name: |
| DOB:                               | Initials: |       |

|                                                                         |  |  |  |
|-------------------------------------------------------------------------|--|--|--|
| How often is the ulcer seen by a health professional in a month? (X 3 ) |  |  |  |
| How often is the ulcer dressing changed per month? (x 3)                |  |  |  |

### Footwear Assessment

What type of shoe do you currently use most of the time?

**1. Sports 2. Dress 3.Diabetic special shoe 4.Custom made shoe 5.Thongs  
6.None**

On average per week how many days do you use this shoe?

Days out of seven? /7

Do you wear orthoses? **Yes No Custom Off-the shelf**

### Note

Quality of life questionnaire to be handed to the patient at this point to fill out then the details and dates for gait assessment visit and follow-up visit on a follow-up card should be given to the patient. Contact details are then recorded separately.

**Pedometer Given to Patient? Yes No**

### Blood Collection – Pathology

**Refer patient to SNP pathology for blood collection.**

|                                         |                                                          |
|-----------------------------------------|----------------------------------------------------------|
| Blood collection form given to patient? | <input type="checkbox"/> Yes <input type="checkbox"/> No |
|-----------------------------------------|----------------------------------------------------------|

| Diabetes and Foot ulceration Study |           |       |
|------------------------------------|-----------|-------|
| Unique Identification Number:      | UR:       | Name: |
| DOB:                               | Initials: |       |

|                                                                |                              |  |
|----------------------------------------------------------------|------------------------------|--|
| Date of Collection                                             | □□/□□□/□□□□ (dd/mm/yyyy)     |  |
| Haemoglobin □□□g/L                                             | LD □□□U/L                    |  |
| WCC □□.□10 <sup>9</sup> /L                                     | Cholesterol □.□mmol/L        |  |
| Platelets □□□10 <sup>9</sup> /L                                | Triglyceride □.□mmol/L       |  |
| Fibrinogen □.□□g/L                                             | HDL □.□mmol/L                |  |
| Sodium □□□ mmol/L                                              | LDL □.□mmol/L                |  |
| Potassium □.□ mmol/L                                           | CRP □□□mg/L                  |  |
| Urea □□□ mmol/L                                                | Chloride □□□mmol/L           |  |
| Creatinine □□□ μmol/L                                          | Bicarbonate □□mmol/L         |  |
| eGFR □□□mL/min/1.73m <sup>2</sup>                              | Calcium □.□□mmol/L           |  |
| Fasting Glucose □□.□μmol/L                                     | Phosphorus □.□mmol/L         |  |
| HAB1C _____%                                                   | Total protein □□g/L          |  |
| CRP _____mg/L                                                  | Hematocrit □.□□mg/dL         |  |
| ESR _____mm/hr                                                 | Neuts □.□10 <sup>9</sup> /L  |  |
| Parathyroid Hormone _____pg/ml                                 | Lymphs □.□10 <sup>9</sup> /L |  |
| <b>N-(carboxymethyl) lysine (CML)</b><br>_____                 | Monos □.□10 <sup>9</sup> /L  |  |
| <b>Non-CML advanced glycation end products (AGEs)</b><br>_____ | Eos □.□10 <sup>9</sup> /L    |  |
| <b>Pentosidine</b><br>_____                                    | Baso □.□□10 <sup>9</sup> /L  |  |
| <b>Homocystine</b>                                             |                              |  |

## **Vascular Biology Unit Blood Sample Storage Form**

| Diabetes and Foot ulceration Study |           |       |
|------------------------------------|-----------|-------|
| Unique Identification Number:      | UR:       | Name: |
| DOB:                               | Initials: |       |

### **Blood Collection –For VBU Biomarker Staff to complete**

|                                                                           |                                                                                                                                                                                                                  |
|---------------------------------------------------------------------------|------------------------------------------------------------------------------------------------------------------------------------------------------------------------------------------------------------------|
| Has blood been collected for study analysis? (Check with SNP and Ratnesh) | <input type="checkbox"/> Yes <input type="checkbox"/> No                                                                                                                                                         |
| Date of Collection                                                        | <input type="text"/> <input type="text"/> / <input type="text"/> <input type="text"/> <input type="text"/> / <input type="text"/> <input type="text"/> <input type="text"/> <input type="text"/><br>(dd/mm/yyyy) |
| 2 x SST                                                                   | <input type="checkbox"/> Yes <input type="checkbox"/> No                                                                                                                                                         |
| 2 x EDTA                                                                  | <input type="checkbox"/> Yes <input type="checkbox"/> No                                                                                                                                                         |
| 1 x Sodium Citrate                                                        | <input type="checkbox"/> Yes <input type="checkbox"/> No                                                                                                                                                         |

### **Sample Storage**

|                                                                            |                                                               |                                                                                                                                                                                                                  |                     |
|----------------------------------------------------------------------------|---------------------------------------------------------------|------------------------------------------------------------------------------------------------------------------------------------------------------------------------------------------------------------------|---------------------|
| Have study bloods been processed and stored according to the lab manual?   |                                                               | <input type="checkbox"/> Yes <input type="checkbox"/> No*<br>*If NO, record a Protocol Deviation                                                                                                                 |                     |
| Date of Processing                                                         |                                                               | <input type="text"/> <input type="text"/> / <input type="text"/> <input type="text"/> <input type="text"/> / <input type="text"/> <input type="text"/> <input type="text"/> <input type="text"/><br>(dd/mm/yyyy) |                     |
|                                                                            | Number of Samples:                                            | Have samples been stored at the Protocol defined temperature?                                                                                                                                                    | Location of Samples |
| Serum<br>(from SST tubes)                                                  | <input type="text"/> <input type="text"/><br>(Store at -80°C) | <input type="checkbox"/> Yes <input type="checkbox"/> No*<br>*If NO, record a Protocol Deviation                                                                                                                 | Box #<br>Position # |
| EDTA Plasma<br>(Purple top EDTA tubes)                                     | <input type="text"/> <input type="text"/><br>(Store at -80°C) | <input type="checkbox"/> Yes <input type="checkbox"/> No*<br>*If NO, record a Protocol Deviation                                                                                                                 | Box #<br>Position # |
| EDTA RBC Pellet<br>(Remaining pellet from EDTA tubes with plasma removed ) | <input type="text"/> <input type="text"/><br>(Store at -80°C) | <input type="checkbox"/> Yes <input type="checkbox"/> No*<br>*If NO, record a Protocol Deviation                                                                                                                 | Box #<br>Position # |
| Citrate Plasma<br>(Blue top Citrate tubes)                                 | <input type="text"/> <input type="text"/><br>(Store at -80°C) | <input type="checkbox"/> Yes <input type="checkbox"/> No*<br>*If NO, record a Protocol Deviation                                                                                                                 | Box #<br>Position # |



| Diabetes and Foot ulceration Study |           |       |
|------------------------------------|-----------|-------|
| Unique Identification Number:      | UR:       | Name: |
| DOB:                               | Initials: |       |

## **Additional Biopsy Procedure Documentation Sheet-**

**Foot ulcer patients only as clinically required.**

Has informed consent been obtained for biopsy?      Yes      No

Has VBU staff been advised about time of biopsy collection?      Yes      No

Appropriate transport medium organised?      Yes      No

### **Doctors Statement**

I have explained

- The patient's condition
- Need for the biopsy
- The procedure and the risk
- Relevant treatment options and their risks
- Likely consequences if those risks occur
- The significant risks and problems specific to this patient.

I have given the patient/substitute decision maker an opportunity to

- Ask questions about any of the above matters
- Raise any other concerns

Which I have answered as fully as possible. I am of the opinion that the patient/ substitute decision maker understands the above information.

Name of Doctor

Designation

Date

Signature

Biopsy Sample appropriately stored at the VBU?      Yes      No

Date of storage of Sample-

### **Part 2: Gait, Pressure and Biomechanical Assessment.**

| Diabetes and Foot ulceration Study |           |       |
|------------------------------------|-----------|-------|
| Unique Identification Number:      | UR:       | Name: |
| DOB:                               | Initials: |       |

**Site- James Cook University, Gait Laboratory.**

**Physical Measurements**

|                       |    |                                                                                              |
|-----------------------|----|----------------------------------------------------------------------------------------------|
| ASIS Breadth          | cm | Mass: <input type="text"/> <input type="text"/> <input type="text"/> <input type="text"/> kg |
| Left Leg length       | cm | Height <input type="text"/> cm                                                               |
| Left Knee diameter    | cm |                                                                                              |
| Left malleolus width  | cm |                                                                                              |
| Right Leg length      | cm |                                                                                              |
| Right Knee diameter   | cm |                                                                                              |
| Right malleolus width | cm |                                                                                              |

**Testing protocol**

Measure up: ☐

EMG prep: ☐

MVC: ☐

Reflective markers prep ☐

Static capture ☐

10 walking trails ☐

Treadmill walking 4 minutes ☐

(Capture only 2:00 onwards)s

Self-Selected Walking Speed \_\_\_\_\_ km/hr.

Plantar pressure capture (3 walks) ☐

**FINISHED**

| Diabetes and Foot ulceration Study |           |       |
|------------------------------------|-----------|-------|
| Unique Identification Number:      | UR:       | Name: |
| DOB:                               | Initials: |       |

| <b><u>Primary Outcome measure</u></b>           | <b><u>Measurement</u></b>                                                                                                                                                                                                                     | <b><u>Left</u></b> | <b><u>Right</u></b> |
|-------------------------------------------------|-----------------------------------------------------------------------------------------------------------------------------------------------------------------------------------------------------------------------------------------------|--------------------|---------------------|
| Peak plantar pressure (N/Cm <sup>2</sup> )      | Medial Heel-<br>Lateral Heel<br>Medial Forefoot<br>Lateral Forefoot                                                                                                                                                                           |                    |                     |
| Pressure time integral (N/Cm <sup>2</sup> ) X s | Medial Heel-<br>Lateral Heel<br>Medial Forefoot<br>Lateral Forefoot                                                                                                                                                                           |                    |                     |
| Time of peak occurrence EMG (%)                 | Vastus Lateralis Lat<br>Gastrocnemius<br>Tibialis Anterior                                                                                                                                                                                    |                    |                     |
| GRF (N/Kg) <sup>D</sup>                         | Vertical<br>Med/Lat<br>Ant/Post                                                                                                                                                                                                               |                    |                     |
| Oxford Foot Model (deg)                         | Hindfoot Sag<br>Hindfoot Fron<br>Hindfoot T.V<br>Forefoot Sag<br>Forefoot Fron<br>Forefoot T.V                                                                                                                                                |                    |                     |
| Lower Limb Kinematics                           | <u>Stance Phase</u><br>Max hip Flex<br>Max hip Ext<br>Max Knee Flex<br>Max Knee Ext<br>Max Ankle DF<br>Max Ankle PF<br><br><u>Swing Phase</u><br>Max hip Flex<br>Max hip Ext<br>Max Knee Flex<br>Max Knee Ext<br>Max Ankle DF<br>Max Ankle PF |                    |                     |

### **Data-Sets Post-Data extraction**

#### **EMG During Gait Assessment**

| Diabetes and Foot ulceration Study |           |       |
|------------------------------------|-----------|-------|
| Unique Identification Number:      | UR:       | Name: |
| DOB:                               | Initials: |       |

### **Maximum Voluntary Contraction**

| <u>Tibialis Anterior</u> | <u>Medial Gastroc</u> | <u>Lateral Gastroc</u> | <u>Peroneus Longus</u> | <u>Soleus</u> | <u>VMO</u> | <u>Semiten</u> |
|--------------------------|-----------------------|------------------------|------------------------|---------------|------------|----------------|
| <u>Right</u>             |                       |                        |                        |               |            |                |
| <u>Left</u>              |                       |                        |                        |               |            |                |

| (%)                    | <u>Tibialis Anterior</u> | <u>Medial Gastroc</u> | <u>Lateral Gastroc</u> | <u>Peroneus Longus</u> | <u>Soleus</u> | <u>VMO</u> | <u>Semiten</u> |
|------------------------|--------------------------|-----------------------|------------------------|------------------------|---------------|------------|----------------|
| <u>Peak Activation</u> |                          |                       |                        |                        |               |            |                |
| Left                   |                          |                       |                        |                        |               |            |                |
| Right                  |                          |                       |                        |                        |               |            |                |
| <u>Contact</u>         |                          |                       |                        |                        |               |            |                |
| Left                   |                          |                       |                        |                        |               |            |                |
| Right                  |                          |                       |                        |                        |               |            |                |
| <u>Stance</u>          |                          |                       |                        |                        |               |            |                |
| Left                   |                          |                       |                        |                        |               |            |                |
| Right                  |                          |                       |                        |                        |               |            |                |
| <u>Toe-off</u>         |                          |                       |                        |                        |               |            |                |
| Left                   |                          |                       |                        |                        |               |            |                |
| Right                  |                          |                       |                        |                        |               |            |                |
| <u>Swing</u>           |                          |                       |                        |                        |               |            |                |
| Left                   |                          |                       |                        |                        |               |            |                |
| Right                  |                          |                       |                        |                        |               |            |                |

### **Treadmill gait assessment**

| Assessment | Parameter | Left | Right |
|------------|-----------|------|-------|
|------------|-----------|------|-------|

| Diabetes and Foot ulceration Study |           |       |
|------------------------------------|-----------|-------|
| Unique Identification Number:      | UR:       | Name: |
| DOB:                               | Initials: |       |

|                         |                                                                                                                                                                                                                                                             |  |  |
|-------------------------|-------------------------------------------------------------------------------------------------------------------------------------------------------------------------------------------------------------------------------------------------------------|--|--|
| Oxford Foot Model (deg) | Hindfoot Sag<br>Hindfoot Fron<br>Hindfoot T.V<br>Forefoot Sag<br>Forefoot Fron<br>Forefoot T.V                                                                                                                                                              |  |  |
| Lower Limb Kinematics   | <b><u>Stance Phase</u></b><br>Max hip Flex<br>Max hip Ext<br>Max Knee Flex<br>Max Knee Ext<br>Max Ankle DF<br>Max Ankle PF<br><br><b><u>Swing Phase</u></b><br>Max hip Flex<br>Max hip Ext<br>Max Knee Flex<br>Max Knee Ext<br>Max Ankle DF<br>Max Ankle PF |  |  |

### **EMG During Treadmill Gait**

| <u>Muscle</u>                           | <u>Tibialis Anterior</u> | <u>Medial Gastroc</u> | <u>Lateral Gastroc</u> | <u>Peroneus Longus</u> | <u>Soleus</u> | <u>VMO</u> | <u>Semitendinosus</u> |
|-----------------------------------------|--------------------------|-----------------------|------------------------|------------------------|---------------|------------|-----------------------|
| <u>Peak Activation</u><br>Left<br>Right |                          |                       |                        |                        |               |            |                       |
| <u>MVC</u><br>Left<br>Right             |                          |                       |                        |                        |               |            |                       |
| <u>Contact</u><br>Left<br>Right         |                          |                       |                        |                        |               |            |                       |
| <u>Stance</u><br>Left<br>Right          |                          |                       |                        |                        |               |            |                       |

| Diabetes and Foot ulceration Study |           |       |
|------------------------------------|-----------|-------|
| Unique Identification Number:      | UR:       | Name: |
| DOB:                               | Initials: |       |

|                |  |  |  |  |  |  |  |
|----------------|--|--|--|--|--|--|--|
| <u>Toe-off</u> |  |  |  |  |  |  |  |
| Left           |  |  |  |  |  |  |  |
| Right          |  |  |  |  |  |  |  |
| <u>Swing</u>   |  |  |  |  |  |  |  |
| Left           |  |  |  |  |  |  |  |
| Right          |  |  |  |  |  |  |  |

### **Summary of Findings**

|                                                                                       |            |           |
|---------------------------------------------------------------------------------------|------------|-----------|
| Is the initial ulcer still present?                                                   | <b>YES</b> | <b>NO</b> |
| Has the ulcer size increased?                                                         | <b>YES</b> | <b>NO</b> |
| Has the ulcer size decreased?                                                         | <b>YES</b> | <b>NO</b> |
| Is there formation of a new ulcer?                                                    | <b>YES</b> | <b>NO</b> |
| Has the ulcer completely healed?                                                      | <b>YES</b> | <b>NO</b> |
| Is there a decrease in glycaemic control?                                             | <b>YES</b> | <b>NO</b> |
| Is there a decrease in renal function?                                                | <b>YES</b> | <b>NO</b> |
| Has the patient commenced dialysis?                                                   | <b>YES</b> | <b>NO</b> |
| Is there increased AGE formation present?                                             | <b>YES</b> | <b>NO</b> |
| Are there differences in the ROM of joints?                                           | <b>YES</b> | <b>NO</b> |
| Is there deterioration of vascular function?                                          | <b>YES</b> | <b>NO</b> |
| Is there a deterioration of neurological function?                                    | <b>YES</b> | <b>NO</b> |
| Has there been a reduction in treatment frequency?                                    | <b>YES</b> | <b>NO</b> |
| Has there been an increase in treatment frequency?                                    | <b>YES</b> | <b>NO</b> |
| Was a biopsy conducted?                                                               | <b>YES</b> | <b>NO</b> |
| Is there infection present?                                                           | <b>YES</b> | <b>NO</b> |
| Has haematological status deteriorated critically? I.e.- Lipid profile, WCC, CRP, ESR | <b>YES</b> | <b>NO</b> |
| Is the participant still suitable for the study?                                      | <b>YES</b> | <b>NO</b> |
| Next visit date provided?                                                             | <b>YES</b> | <b>NO</b> |

| Diabetes and Foot ulceration Study |           |       |
|------------------------------------|-----------|-------|
| Unique Identification Number:      | UR:       | Name: |
| DOB:                               | Initials: |       |

If the participant is no longer suitable for the study, please send a letter of thanks for being involved in the study, otherwise provide date and time of next consultation.

Date and time of next consultation \_\_\_\_\_

1. Blood Collection Form Given
2. Questionnaires Collected (4)
3. Review-date organised
4. Pedometer calibrated and given?
5. Instructions given on Pedometer return?

## **Notes**

### **Summary of Findings**

| Diabetes and Foot ulceration Study |           |       |
|------------------------------------|-----------|-------|
| Unique Identification Number:      | UR:       | Name: |
| DOB:                               | Initials: |       |

|                                                                                       |                |    |
|---------------------------------------------------------------------------------------|----------------|----|
| Is the same ulcer still present?                                                      | YES            | NO |
| Has the ulcer size increased?                                                         | YES            | NO |
| Has the ulcer size decreased?                                                         | YES            | NO |
| Is there formation of a new ulcer?                                                    | YES            | NO |
| Has the ulcer completely healed?                                                      | YES            | NO |
| Is there a decrease in glycaemic control?                                             | YES            | NO |
| Is there a decrease in renal function?                                                | YES            | NO |
| Has the patient commenced dialysis                                                    | YES            | NO |
| Is there increased AGE formation present?                                             | YES            | NO |
| Are there differences in the ROM of joints?                                           | YES            | NO |
| Is there deterioration of vascular function?                                          | YES            | NO |
| Is there a deterioration of neurological function?                                    | YES            | NO |
| Has there been a reduction in treatment frequency?                                    | YES            | NO |
| Has there been an increase in treatment frequency?                                    | YES            | NO |
| Was a biopsy conducted?                                                               | YES            | NO |
| Is there infection present?                                                           | YES            | NO |
| Has haematological status deteriorated critically? I.e.- Lipid profile, WCC, CRP, ESR | YES            | NO |
| Is the participant still suitable for the study?                                      | YES            | NO |
| Next visit date provided                                                              | ____/____/____ |    |

**If the participant is no longer suitable for the study, please send a letter of thanks for being involved in the study, otherwise provide date and time of next consultation.**

Next consultation visit-

**End of Study:**

|                                                        |
|--------------------------------------------------------|
| Did the participant complete all aspects of the study? |
|--------------------------------------------------------|



| Diabetes and Foot ulceration Study |           |       |
|------------------------------------|-----------|-------|
| Unique Identification Number:      | UR:       | Name: |
| DOB:                               | Initials: |       |

|                                                                                                                            |                                                                                               |
|----------------------------------------------------------------------------------------------------------------------------|-----------------------------------------------------------------------------------------------|
| <input type="checkbox"/> Yes                                                                                               | <input type="checkbox"/> No                                                                   |
| <input type="checkbox"/> According to the protocol                                                                         | <input type="checkbox"/> Participant withdrew*                                                |
| <input type="checkbox"/> With protocol deviations or violations (ensure these are recorded on the protocol deviation page) | <input type="checkbox"/> Lost to follow-up                                                    |
|                                                                                                                            | <input type="checkbox"/> Participant deceased<br>(ensure an SAE has been recorded & reported) |
|                                                                                                                            | Patient declined further involvement*                                                         |
|                                                                                                                            | <input type="checkbox"/> Other*                                                               |
| *Comment:                                                                                                                  |                                                                                               |

Has a letter of thanks been sent to the participant along with a 1-page summary of significant findings?

**YES**

**NO**

Has a letter of thanks been sent to the participant along with a 1-page summary of significant findings to the referring practitioner?

**YES**

**NO**

| Diabetes and Foot Ulceration Study |           |       |
|------------------------------------|-----------|-------|
| Unique Identification Number:      | UR:       | Name: |
| DOB:                               | Initials: |       |

**Protocol Deviations:**

| Deviation Number | CRF Page Number | Deviation | Recorded by |
|------------------|-----------------|-----------|-------------|
| 1                |                 |           |             |
| 2                |                 |           |             |
| 3                |                 |           |             |
| 4                |                 |           |             |
| 5                |                 |           |             |
| 6                |                 |           |             |
| 7                |                 |           |             |
| 8                |                 |           |             |
| 9                |                 |           |             |
| 10               |                 |           |             |
| 11               |                 |           |             |
| 12               |                 |           |             |
| 13               |                 |           |             |
| 14               |                 |           |             |
| 15               |                 |           |             |
| 16               |                 |           |             |
| 17               |                 |           |             |
| 18               |                 |           |             |
| 19               |                 |           |             |
| 20               |                 |           |             |

| Diabetes and Foot Ulceration Study |           |       |
|------------------------------------|-----------|-------|
| Unique Identification Number:      | UR:       | Name: |
| DOB:                               | Initials: |       |

**End of CRF:**

|                                     |             |
|-------------------------------------|-------------|
| Data collection completed by (Name) |             |
| Signature                           |             |
| Date completed                      | □□/□□□/□□□□ |
| Principle Investigator (Name):      |             |
| Signature                           |             |
| Date                                | □□/□□□/□□□□ |
